# 1 Regulation of spatial and temporal gene expression in an animal 2 germline

3

4 Asija Diag<sup>1,3</sup>, Marcel Schilling<sup>1,3</sup>, Filippos Klironomos<sup>1,2</sup>, Salah Ayoub<sup>1</sup> and Nikolaus  
5 Rajewsky<sup>1,4</sup>

6

7 <sup>1</sup> Laboratory for Systems Biology of Gene Regulatory Elements, Berlin Institute for Medical Systems Biology,  
8 Max-Delbrück-Center for Molecular Medicine, Robert-Rössle-Strasse10, 13125 Berlin, Germany

9 <sup>2</sup> Department of Pediatrics, Division of Oncology and Hematology, Charité University Medical Centre,  
10 Augustenburger Platz 1, 13353 Berlin, Germany

11 <sup>3</sup> These authors contributed equally to this work

12 <sup>4</sup> Lead Contact, correspondence: rajewsky@mdc-berlin.de

13

## 14 SUMMARY

15 In animal germlines, regulation of cell proliferation and differentiation is particularly important  
16 but poorly understood. Here, using a cryo-cut approach, we mapped RNA expression along  
17 the *Caenorhabditis elegans* germline and, using mutants, dissected gene regulatory  
18 mechanisms that control spatio-temporal expression. We detected, at near single-cell  
19 resolution, > 10,000 mRNAs, > 300 miRNAs and numerous novel miRNAs. Most RNAs were  
20 organized in distinct spatial patterns. Germline-specific miRNAs and their targets were co-  
21 localized. Moreover, we observed differential 3' UTR isoform usage for hundreds of mRNAs.  
22 In tumorous *gld-2 gld-1* mutants, gene expression was strongly perturbed. In particular,  
23 differential 3' UTR usage was significantly impaired. We propose that PIE-1, a transcriptional  
24 repressor, functions to maintain spatial gene expression. Our data also suggest that *cpsf-4*  
25 and *fipp-1* control differential 3' UTR usage for hundreds of genes. Finally, we constructed a  
26 “virtual gonad” enabling “virtual *in situ* hybridizations” and access to all data  
27 (<https://shiny.mdc-berlin.de/spacegerm/>).

## 1 INTRODUCTION

2 Spatial and temporal restriction of gene expression has been considered for decades to be a  
3 crucial conserved mechanism for cellular and developmental programs such as specification  
4 of cell fates and compartmentalization. The function of mRNA localization is diverse  
5 (Buxbaum et al., 2015; Jansen, 2001; Martin and Ephrussi, 2009). On the one hand,  
6 localization of mRNA is thought to be more energy efficient as it serves as a template for  
7 multiple rounds of translation (Jansen, 2001; Martin and Ephrussi, 2009). On the other hand,  
8 local translation might protect other cells or compartments from proteins that are toxic for  
9 these cells or compartments (Martin and Ephrussi, 2009). Which mechanisms control mRNA  
10 localization? Recent studies suggested that alternative polyadenylation (APA) and hence  
11 3' Untranslated Regions (3' UTRs) are an important post-transcriptional mechanism that  
12 regulates spatial restricted gene expression and cell fate transition (Brumbaugh et al., 2018;  
13 Mayr, 2017). Recent *in vivo* studies on the *C. elegans* germline revealed that 3' UTR are the  
14 primary regulators of gene expression (Merritt et al., 2008). Furthermore, differential 3' UTR  
15 usage can modulate the balance between proliferation and differentiation (Lackford et al.,  
16 2014; Mayr and Bartel, 2009; Sandberg et al., 2008; Shepard et al., 2011; Sood et al., 2006;  
17 2009). Cells must decide, whether, when, where and how fast to proliferate in order to keep  
18 the balance between proliferation and differentiation as improper regulation can lead to  
19 developmental defects and cancer. However, our understanding of how mRNA localization  
20 regulates the balance between proliferation and differentiation remains limited.

21 The *C. elegans* germline is a powerful *in vivo* model for studying the balance between  
22 proliferation and differentiation. The basic factors, molecular architecture and processes are  
23 similar to that of other metazoans and major players have been remarkably conserved during  
24 evolution. The germline is divided into different compartments: In the distal portion of each  
25 arm and in close proximity to the germline niche (distal tip cell) proliferative germ cells are  
26 located, which form a syncytial tissue (Hirsh et al., 1976) (**Figure 1A**). In the distal arm, at a  
27 defined distance from the niche, germ cells exit the mitotic cell cycle and start differentiation  
28 by entering meiosis (**Figure 1A**). This switch from proliferation to differentiation is termed  
29 mitosis-to-meiosis transition. As part of the intrinsic oogenesis program, many early germ  
30 cells undergo apoptosis, around the bend region (Gartner et al., 2008). Only certain germ  
31 cells differentiate to become oocyte or sperm.

32 Previous studies already showed evidence that spatio-temporal restriction of RNA binding  
33 proteins (RBPs) in the *C. elegans* germline can regulate mRNA expression by binding to  
34 their 3' UTR (Crittenden et al., 2006; Nusch and Eckmann, 2013). One important example is  
35 GLD-1, an RBP that binds multiple mRNAs including its own mRNA, thereby regulating the  
36 switch from proliferation to differentiation (Brenner and Schedl, 2016; Francis et al.; Jones et  
37 al., 1996; Jungkamp et al., 2011). Additionally, GLD-2, the cytoplasmic poly(A)-polymerase

38 (cytoPAP) in the *C. elegans* germline, is accumulating around the pachytene stage in the  
39 germline, and promotes meiotic entry by polyadenylation of mRNAs that are required for  
40 differentiation (Millonigg et al., 2014; Nousch et al., 2014, 2017).

41 Besides RBPs and 3' UTRs being key players in regulating mRNA stability, in translation and  
42 in localization, previous studies suggested that microRNAs (miRNAs) might control  
43 proliferation and differentiation in the *C. elegans* germline (Bukhari et al., 2012; Ding et al.,  
44 2008). MicroRNAs (miRNAs), belonging to the class of small non-coding RNAs are important  
45 and conserved post-transcriptional regulators of gene expression that bind mRNAs, primarily  
46 in their 3' UTR (Bartel, 2018). Usually, miRNA binding leads to transcript destabilization  
47 and/or translational inhibition. Bukhari and colleagues showed that loss-of-function of *alg-1*  
48 and *alg-2*, two miRNA-specific Argonaute proteins in *C. elegans*, leads to a reduced mitotic  
49 region and less proliferative cells in the *C. elegans* germline, indicating an important role of  
50 miRNAs in controlling germ cell biogenesis in the germline (Bukhari et al., 2012). So far, due  
51 to technical limitations such as low RNA content of the *C. elegans* germline and lack of  
52 sequencing protocols for low input materials, it has not been possible to gain a system-wide  
53 spatio-temporal resolved characterization of miRNA expression during germ cell proliferation  
54 and differentiation, with exception of the oocyte-to-embryo transition (Stoeckius et al., 2014).

55  
56 Here we established an optimized version of the tomo-seq approach (Junker et al., 2014)  
57 and improved sequencing protocols for the *C. elegans* germline. Thus, we were able to  
58 quantify mRNA and miRNA expression at near single cell resolution, as a function of position  
59 along the germline. We capture *in vivo* RNA expression during the entire development of  
60 germ cells through proliferation and differentiation. With our approach we were able to detect  
61 novel miRNAs with highly restricted expression. As we also analysed several mutants, our  
62 data offer specific insights into mechanisms which are functionally important during germ cell  
63 development. We compared the spatio-temporal resolved gene expression of wild type  
64 germline to the *gld-2 gld-1* double mutant germline, unravelling new potential key players  
65 such as PIE-1, a maternal protein that blocks transcription, in the transition from proliferation  
66 to differentiation. By careful bioinformatics analysis of our data we discovered also hundreds  
67 of novel 3' UTRs which had escaped previous approaches probably because they were often  
68 specifically expressed. Furthermore, we discovered that widespread differential 3' UTR  
69 usage takes place along the germline. Strikingly, this phenomenon, which is key for changing  
70 regulation of mRNAs across space and time, was perturbed in the *gld-2 gld-1* mutants. With  
71 the exception of *cpsf-4* and *fipp-1*, all other factors known to regulate alternative 3' UTR  
72 usage were not perturbed in the mutant, strongly arguing that the dynamic expression of  
73 these two factors are key contributors to differential 3'UTR expression. To provide a user-  
74 friendly interface of our massive data and to analyse gene expression of different genes but

75 compared to a “universal” germline reference coordinate system, we set out to create a 3D  
76 germline model. By collecting data from the literature, by mining our own microscopy data,  
77 and by mathematical modelling we were able to create “SPACEGERM”, a model that reflects  
78 germline gene expression at near single cell resolution. SPACEGERM can be interactively  
79 mined remotely via the internet and can be used to perform systematically “virtual *in situs*” for  
80 >10,000 mRNAs and hundreds of miRNAs. In summary, we created the first map of spatially  
81 and temporally resolved germline mRNA and miRNA expression and our analysis provides  
82 crucial insights into mechanisms and function of RNA during germline development.

## 1 RESULTS

### 2 mRNAs and miRNAs are localized in the germline

3 To investigate the spatial and temporal distribution of gene expression along the germline,  
4 we dissected and embedded gonads, which harbour the germline, of young adults in tissue  
5 freezing medium. This entire procedure takes only a few minutes, minimizing RNA  
6 degradation. We then cryo-sectioned the gonads into ~15 slices of 50  $\mu\text{m}$  thickness and  
7 performed RNA-seq on each slice with slightly different experimental approaches for mRNAs  
8 and small RNAs (**Figure 1B**). Analysis of the mRNA data revealed that most reads matched  
9 known *C. elegans* transcripts. Furthermore, quantified transcripts were in line with a poly(A)  
10 selection profile as expected due to the barcoded oligo(dT) primer used for capture (**Figure**  
11 **S1A, S1B** and **S4A**). Comparing pairs of biological and technical replicates confirmed that  
12 our experimental approach is highly reproducible with a Pearson correlation coefficient of  
13 0.96 (**Figure S1C** and **S4B**). Additionally, as a control, we performed our experimental  
14 approach with uncut gonads and compared it to a sliced gonad in order to investigate if the  
15 slicing had an influence on the measured gene expression. By averaging the measurement  
16 of gene expression across slices, we were even able to reconstruct *in silico* the gene  
17 expression profile of the uncut gonad (**Figure S1D** and **S4C**). Furthermore, we showed that  
18 our sequencing method is reliable, since it compared very well to other sequencing  
19 approaches such as Poly(A)<sup>+</sup>-seq and ribosomal RNA depleted total RNA-seq (**Figure S1F**).  
20 As our biological replicates were slightly shifted and compressed to each other due to  
21 different cutting start points, we aligned samples to a common coordinate system (see  
22 Methods) before integrating the data of all replicates for downstream analyses. The *C.*  
23 *elegans* hermaphrodite germline contains two gonad arms, the anterior and the posterior  
24 gonad arm. We cut both arms to investigate any difference in gene expression between the  
25 arms. However, as expected and in concordance with the literature, we did not detect any  
26 difference between both arms above background (**Figure S2A**). Observable differences in  
27 gene expression between anterior and posterior decrease with rising expression levels,  
28 arguing that these differences reflect noise. Hence, we treated the samples as biological  
29 replicates and could therefore increase the statistical power of our analysis. Investigating the  
30 expression of mRNAs and miRNAs, revealed that both RNA classes display distinct  
31 localization pattern across the germline (**Figure 1C, 1D, S2B, S2C** and **S2D**). The gene  
32 expression profiles were consistent with *in situ* hybridization images of the gonad that we  
33 performed (**Figure 1D, 1E, S2A, S2B** and **S2C**). Altogether, these results demonstrate that  
34 our sequencing approach is reproducible and reliable and that the data reveal spatio-  
35 temporal organization of mRNAs and miRNAs throughout the germline.

36

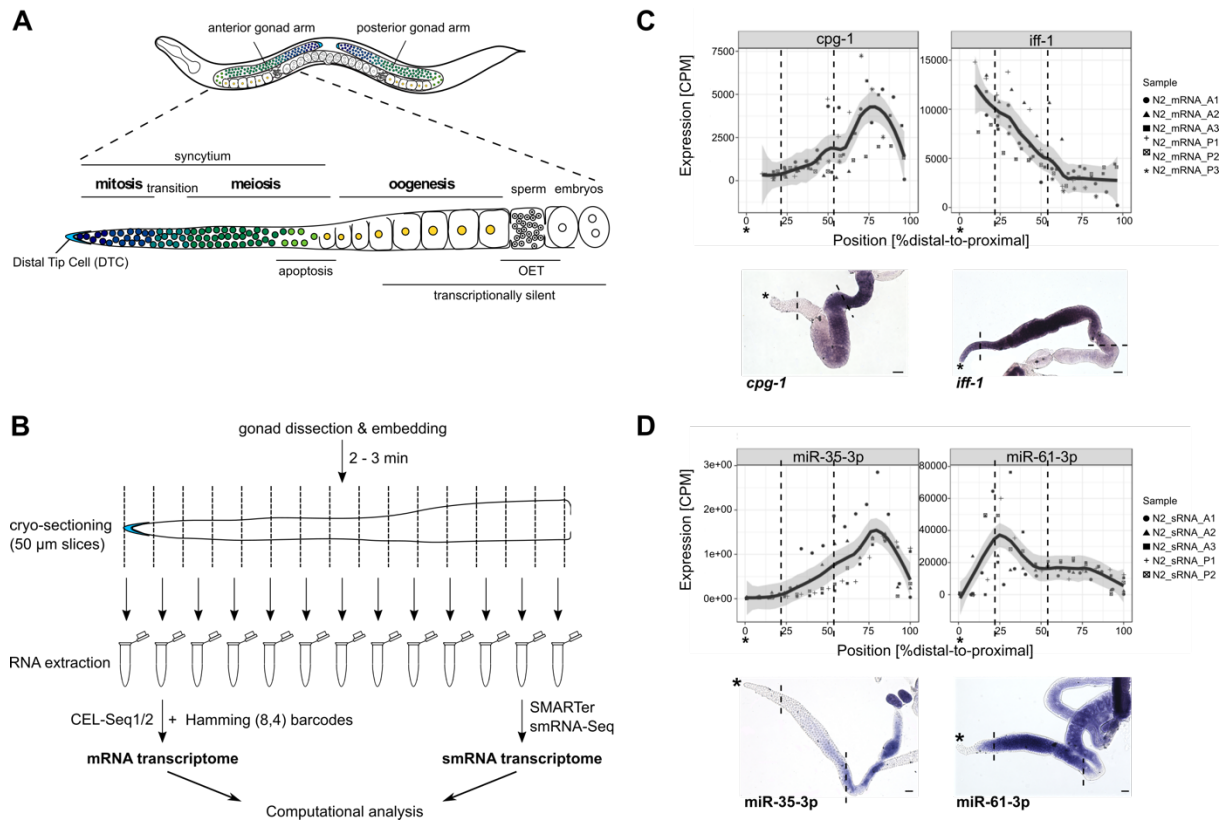

37  
38  
39  
40  
41  
42  
43  
44  
45  
46  
47  
48  
49  
50

### Figure 1. mRNAs and miRNAs are localized in the germline

(A) Schematic overview of the *Caenorhabditis elegans* gonad. OET: Oocyte-to-embryo transition.

(B) Schematic overview of the experimental approach.

(C) Spatial expression of *cpg-1* and *iff-1* from distal to proximal. n=6 independent experiments (N2\_mRNA\_A1-A3 and N2\_mRNA\_P1-P3) for wild type N2, LOESS  $\pm$  standard error (SE). Corresponding *in situ* hybridization (ISH) images of *cpg-1* and *iff-1*. Asterisk: Distal tip cell (DTC). Scale bar: 20  $\mu$ m. Dashed lines represent the different zones in the germline.

(D) Spatial expression of miR-35-3p and miR-61-3p from distal to proximal. n=5 independent experiments (N2\_sRNA\_A1-A3 and N2\_sRNA\_P1-P2) for wild type N2, LOESS  $\pm$  SE. Corresponding ISH images of miR-35-3p and miR-61-3p. Asterisk: DTC. Scale bar: 20  $\mu$ m. Dashed lines represent the different zones in the germline.

See also Figure S1, S2 and S4.

### A 3D germline model reflects RNA localization through germ cell proliferation and differentiation

53 As our data enables the systematic expression profiling of RNA along the germline in wild  
54 type and mutants, we thought that it would be useful to construct a model of the germline that  
55 can serve as a generalized framework on which expression data can be displayed and  
56 compared. We systematically collected published data about the size and composition of  
57 each zone in the germline (Brenner and Schedl, 2016; Fox et al., 2011; Hansen and Schedl,  
58 2013; Hirsh et al., 1976; Hubbard, 2007; Maciejowski et al., 2006; Wolke et al., 2007) and  
59 quantified our own gonad images (Table S1). Using these data, we were able to compute an  
60 *in silico* 3D physical germline model (METHODS, Figure 2A). Within the model we assigned

61 the number of germ cells to each zone and defined the size of each zone in the germline  
62 (**Figure 2A**). Despite the simplifications of the 3D model, we were able to reliably reveal RNA  
63 expression throughout the germline by integrating our sequencing data into the model  
64 (**Figure 2B, 2C and 2D**). We used the 3D model as a guide to assign the different germline  
65 zones to our expression profiles. Thus, our 3D germline model integrates *in vivo* mRNA and  
66 miRNA expression throughout proliferation and differentiation of germ cells (**Figure 2B, 2C**  
67 and **2D**). Moreover, the model represents *in vivo* mRNA expression in perturbed systems  
68 such as the *gld-2 gld-1* double mutant (**Figure 2B**). In order to validate the assignment of the  
69 zones in our 3D model, we searched for apoptotic gene markers in the germline as most of  
70 the germ cells undergo apoptosis around the bend region. Indeed, we found apoptotic genes  
71 such as *ced-4*, having their highest expression precisely around the bend region that starts at  
72 a distance of approx. 350  $\mu\text{m}$  from the distal tip cell (DTC) (**Figure 2C**) in accordance with  
73 the assignment of the bend region in our model. Finally, our 3D model also represents  
74 miRNA localization throughout the germline (**Figure 2D**). Overall, we believe that the virtual  
75 germline may serve as a reference to future studies.



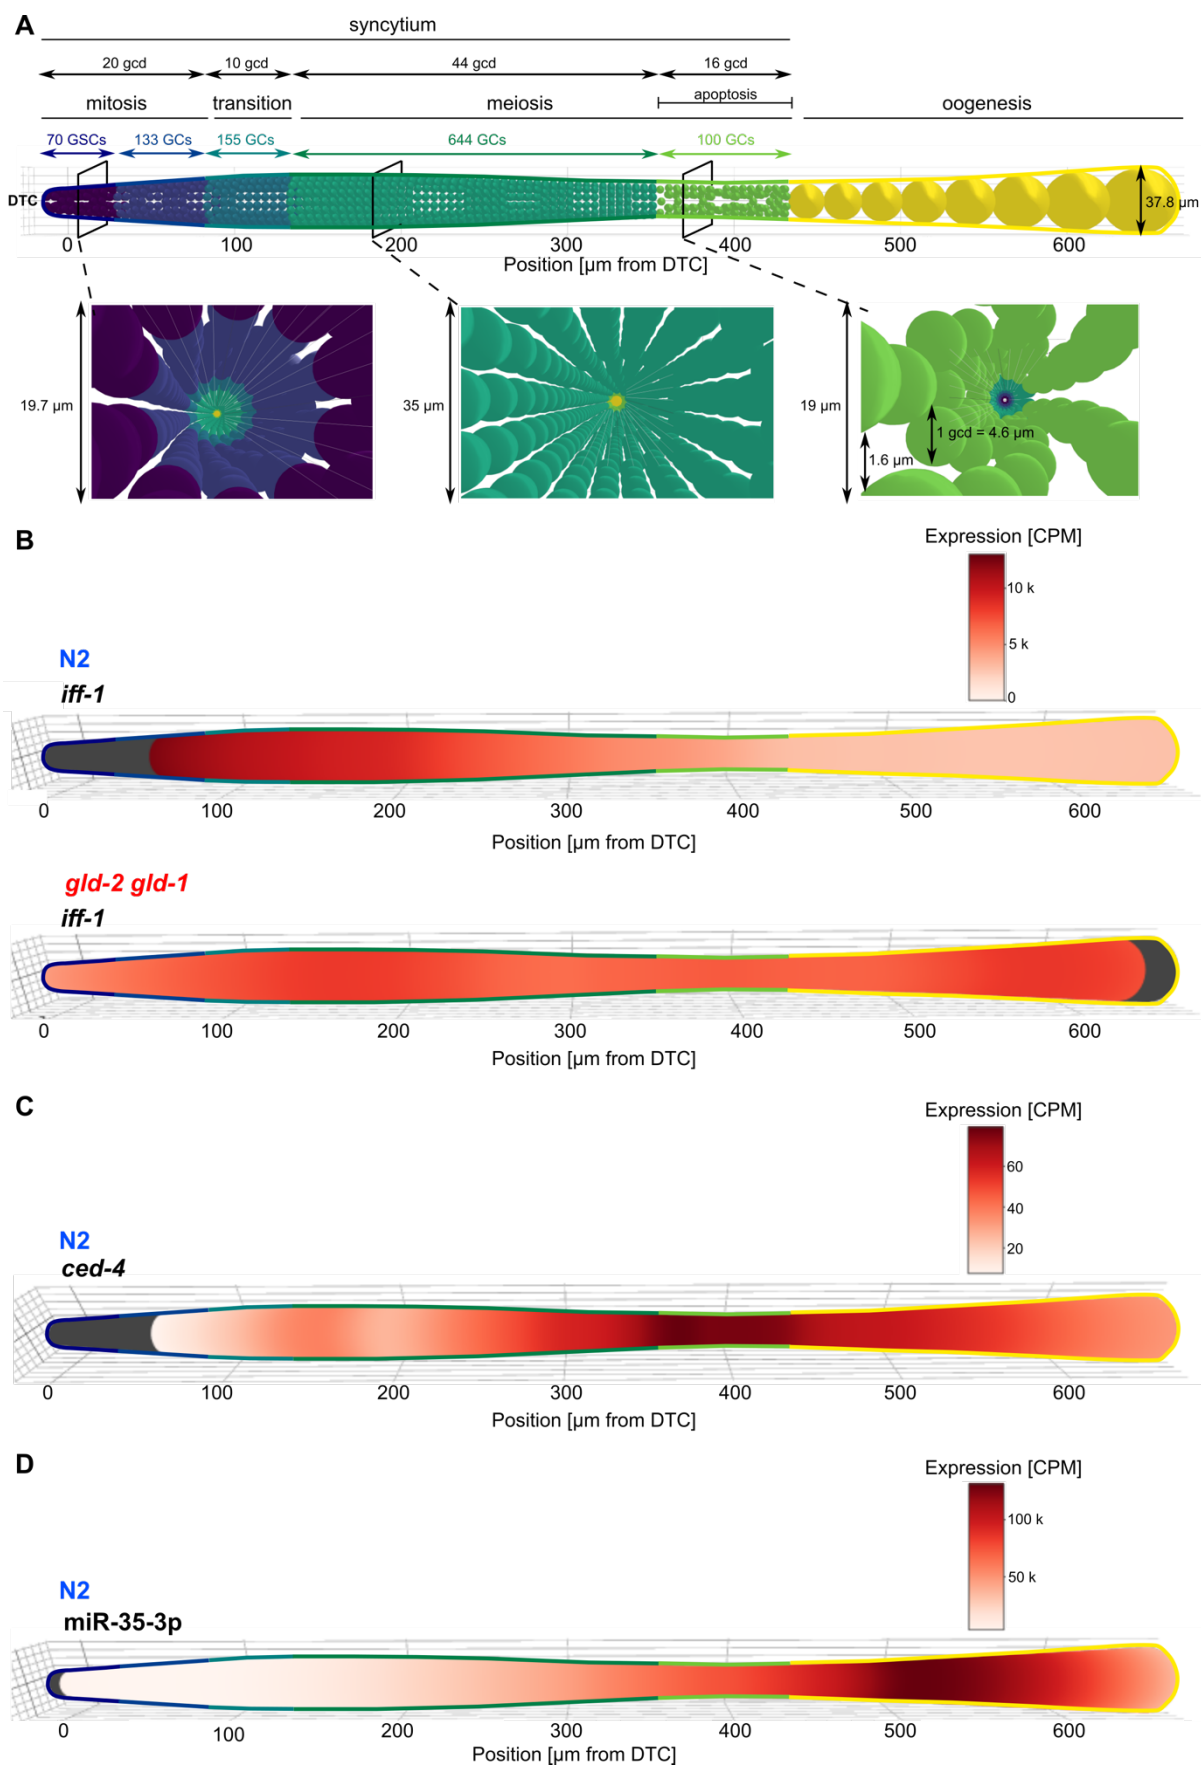

76  
77  
78



79 **Figure 2. A 3D germline model reflects RNA localization throughout germ cell proliferation and**  
80 **differentiation**

81 (A) 3D germline model with assigned sizes of each zone in germ cell diameter (gcd) and corresponding germ cell  
82 (GC) numbers. Three cross sections are shown at 70  $\mu\text{m}$ , 200  $\mu\text{m}$  and 380  $\mu\text{m}$  from the distal tip cell (DTC).

83 (B) 3D germline model representing *in vivo* expression of *iff-1* in N2 and *gld-2 gld-1* double mutant. Grey: No  
84 data.

85 (C) 3D germline model representing *in vivo* expression of *ced-4* in N2. Grey: No data.

86 (D) 3D germline model representing *in vivo* expression of miR-35-3p in N2. Grey: No data.

87 See also Figure S7 and Table S1.

88

89 **Spatial gene expression is perturbed in *gld-2 gld-1* double mutants**

90 To determine whether mRNAs display a global localization pattern throughout the germline  
91 we clustered the expression of germline specific genes (Wang et al., 2009) according to  
92 Pearson's linear correlation ( $1 - \text{Pearson's } r$ ). Clustering the expression data revealed that  
93 mRNAs are organized in groups with distinct localization patterns (**Figure 3A**). We observed  
94 many different gene clusters along the germline. However, assigning these clusters to the  
95 zones in the germline (Brenner and Schedl, 2016; Hirsh et al., 1976) showed that most  
96 genes peaked in expression either in the mitotic or oogenesis region, whereas in the meiotic  
97 region genes required for proliferation/mitosis slowly decrease while genes required for  
98 differentiation/oogenesis slowly increase abundance.

99 To test whether mRNA localization is important for the transition between proliferation and  
100 differentiation we performed the cryo-based method for the *gld-2 gld-1* double mutant which  
101 possess only one third of meiotic entry (Brenner and Schedl, 2016; Kadyk and Kimble,  
102 1998), ending up in a solely proliferating and tumorous germline. Hence, the *gld-2 gld-1*  
103 germline lacks oocytes and is sterile. Consistent with this fact, clustering the expression of  
104 germline specific genes for the *gld-2 gld-1* mutant revealed that mRNA localization is  
105 perturbed compared to the wild type (**Figure 3A**). In most cases, genes required for  
106 proliferation, *e.g.*, *iff-1*, were expressed continuously throughout the germline whereas genes  
107 required for embryogenesis were downregulated, *e.g.*, *perm-2* and *perm-4*. However,  
108 clustering of the same genes in the *gld-2 gld-1* double mutant, revealed that some genes still  
109 localize in the mutant (**Figure S3A**). In addition to the *gld-2 gld-1* double mutant, we further  
110 investigated the spatial gene expression of the *glp-1 (gf)* mutant germline which possesses a  
111 prolonged proliferative zone. The mutant is temperature sensitive resulting in an inducible  
112 tumorous phenotype. Hence dissection of gonads from these mutants was impeded.  
113 Therefore, we only induced the phenotype for a short time avoiding tumour development. As  
114 the induction of the mutation was very short, the spatial gene expression resembled more the  
115 wild type germline (**Figure S3B**).

116 Based on the finding that mRNAs are localized in the wild type germline and that this  
117 localization pattern is perturbed in the *gld-2 gld-1* mutant, we explored whether there are

118 specific mRNAs localizing to a certain zone of the germline, *i.e.*, proliferation or  
119 differentiation. Investigating one specific cluster, distally peaking genes, in more detail, we  
120 observed that many genes encoding for a ribosomal subunit (*rpl* and *rps* genes) had their  
121 highest expression in the distal gonad arm and decreased in expression in the proximal arm  
122 (**Figure 3B**). Interestingly, this was not the case for the *gld-2 gld-1* double mutant (**Figure**  
123 **3B**). The *rpl* and *rps* genes had a similar expression levels in the *gld-2 gld-1* double mutant  
124 as in the wild type but the expression did not decrease in the proximal arm but stayed  
125 constant along the germline, suggesting an important role of these genes in proliferation.  
126 This result was consistent with *in situ* hybridization images (**Figure 3C** and **3D**). In contrast to  
127 the *rpl* and *rps* genes, we observed some genes that had their highest expression in the  
128 proximal arm in the wild type while these genes were downregulated or completely absent in  
129 the *gld-2 gld-1* mutant (**Figure 3E**). We identified *pie-1*, *cey-2* and *nos-2* amongst these  
130 genes. The *pie-1* gene encodes for a maternal CCCH finger protein which is specific for  
131 oocytes and embryos (Merritt et al., 2008; Tenenhaus et al., 2001). Previous studies showed  
132 evidence that PIE-1 is a bifunctional protein that blocks the transcription of somatic  
133 transcripts during blastomere development, ensuring the germline fate and that it is required  
134 for the maintenance of class II mRNAs, mRNAs that are associated with P granules in the  
135 germline (Seydoux and Dunn, 1997; Seydoux and Fire, 1994; Seydoux et al., 1996;  
136 Tenenhaus et al., 2001). Additionally, it was shown that *pie-1* is a target of the cytoplasmic  
137 polymerase, GLD-2 (Kim et al., 2010). Consistent with these previous described findings, we  
138 observed in the *gld-2 gld-1* mutant, where GLD-2 is depleted, a strong downregulation of *pie-*  
139 *1* as well as *nos-2* and *cey-2*, two class II mRNAs. Together, these results suggest that *rpl*  
140 and *rps* genes are important for germ cell proliferation and that their transcription may be  
141 blocked by PIE-1 in the proximal arm while on the other hand *nos-2* and *cey-2* are important  
142 for differentiation which expression is maintained through PIE-1 expression.

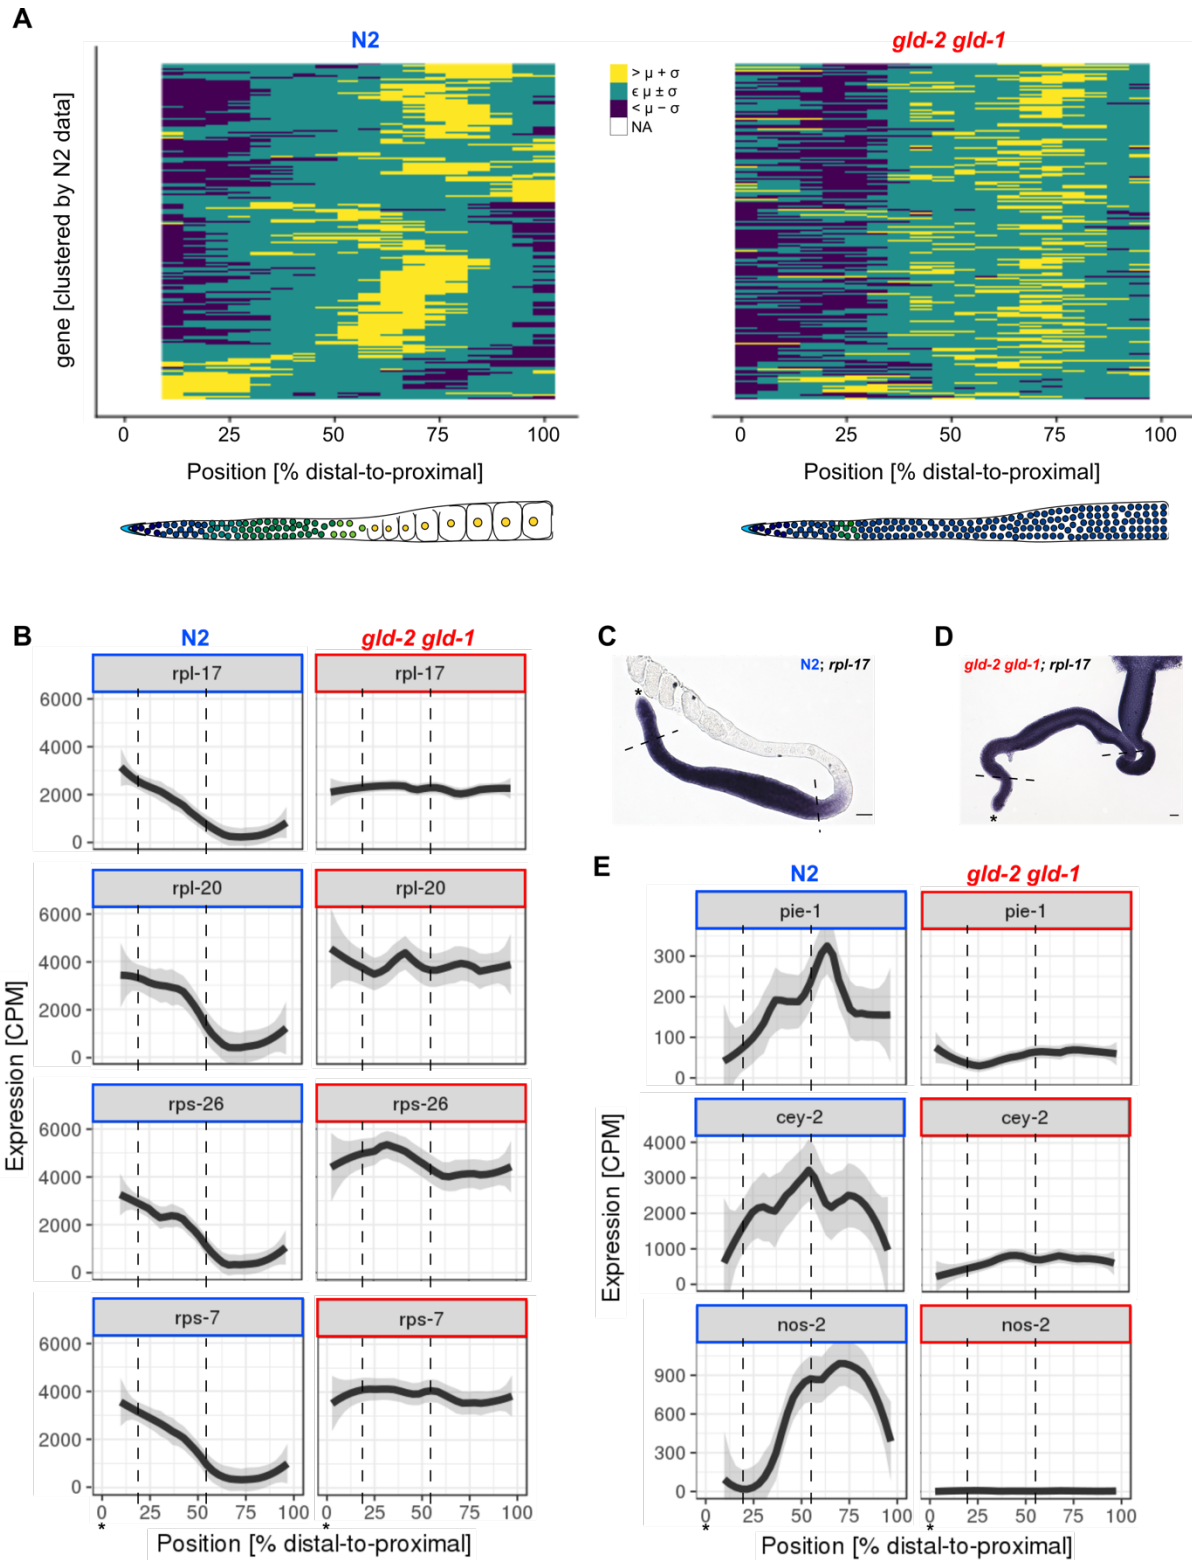

143

144

145 **Figure 3. Spatial gene expression is perturbed in *gld-2 gld-1* double mutants**

146 (A) Hierarchical clustering of germline specific genes by linear correlation ( $1 - \text{Pearson's } r$ ) for N2 and *gld-2 gld-1*  
 147 double mutant.  $\mu$ : Mean;  $\sigma$ : Standard deviation. NA: No data.

148 (B) Spatial expression of two *rpl* genes (*rpl-17* and *rpl-20*) and two *rps* genes (*rps-26* and *rps-7*) in N2 and *gld-2*  
 149 *gld-1* double mutant from distal-to-proximal, respectively.  $n=6$  independent experiments for N2 and  $n=4$   
 150 independent experiments for *gld-2 gld-1* double mutant, LOESS  $\pm$  standard error (SE). Dashed lines represent the  
 151 different zones in the germline. Asterisk: Distal tip cell (DTC).

152 (C) *In situ* hybridization (ISH) image of *rpl-17* in N2. Asterisk: DTC. Scale bar: 20  $\mu$ m. Dashed lines represent  
153 different zones in the germline.

154 (D) ISH of *rpl-17* in *gld-2 gld-1* double mutant. Asterisk: DTC. Scale bar: 20  $\mu$ m. Dashed lines represent the  
155 different zones in the germline. Asterisk: DTC.

156 (E) Spatial expression of *pie-1*, *cey-2* and *nos-2* in N2 and *gld-2 gld-1* double mutant from distal to proximal,  
157 respectively. n=6 independent experiments for N2 and n=4 independent experiments for *gld-2 gld-1* double  
158 mutant, LOESS  $\pm$  SE. Dashed lines represent different zones in the germline.

159 See also Figure S3.

160

### 161 **Germline-specific small RNA sequencing identifies novel miRNAs**

162 In order to investigate the spatially restricted expression of miRNAs in the germline we used  
163 the SMARTer smRNA kit from Clontech<sup>®</sup>. The kit has a very low level of bias as adapter  
164 ligation is completely abolished (Dard-Dascot et al., 2018). Instead, the 3' adapter is added  
165 after polyadenylation of the total RNA and by oligo-dT priming in that poly(A) tail and 5'  
166 adapter is added through reverse transcriptase template-switching. A side effect of the  
167 SMARTer kit, as reported by Dard-Dascot and colleagues, is the high frequency of side  
168 products like adapter concatemers. However, standard preprocessing of small RNA  
169 sequencing raw reads requires efficient adapter trimming which removes such artefacts.  
170 While this approach has the potential to capture other small RNAs, we focused on miRNAs  
171 as this class of small RNAs was implicated in regulation of proliferation and differentiation  
172 during germline development (Bukhari et al., 2012). Of note, clustering the expression of all  
173 detected miRNAs in the germline revealed that miRNAs are organized spatially in the  
174 germline (**Figure 4A**). The spatial patterns of miRNAs were similar to those of mRNAs  
175 (**Figure 3A**).

176 Due to technical limitations, *i.e.*, sequencing of small RNAs with very low input material  
177 ( $\leq$  1 ng total RNA), it is likely that miRNAs specifically expressed in the gonad or even limited  
178 to a specific region therein would have been missed by previous attempts to identify miRNAs  
179 as their signal would have been diluted out. As such highly specific miRNAs would be prime  
180 candidates for key regulators of spatial expression in the gonad, we screened our germline  
181 specific small RNA-seq data for potential novel miRNAs. Therefore, we ran miRDeep2  
182 (Friedländer et al., 2012) on our data. Indeed, we were able to predict 83 novel precursor  
183 miRNAs (**Figure 4B** and **Table S2**). In order to quantify these novel miRNAs, we included  
184 the mature and precursors of the novel miRNA predictions in the miRBase21 reference and  
185 re-ran miRDeep2 for quantification of known and novel miRNAs in each slice separately.  
186 Novel miRNAs as well as known miRNAs were reproducibly quantifiable. Remarkably, most  
187 of the novel miRNAs were, when averaged over the germline, very lowly expressed  
188 ( $\leq$  100 CPM), explaining why they were missed in previous studies. Unlike most known  
189 miRNAs, several novel miRNAs were primarily expressed in the distal part of the germline  
190 suggesting a specific role for these miRNAs in the proliferation (**Figure 4B**).

191 As low expression and distinct localization could be an indication of technical artefacts, we  
192 picked four (nov-1-3p, nov-63-3p, nov-72-3p and nov-82-5p) out of the 83 putative new  
193 precursor miRNAs with different expression levels for validation. All four candidates revealed  
194 a miRNA-like hairpin structure when folding their pre-miRNA sequence *in silico* with star and  
195 mature sequences extensively complementing each other (**Figure 4C**). Furthermore, the  
196 read coverage was miRNA-like with reads stacking up mostly on the mature sequence at  
197 aligned 5' positions (**Figure S5A, S5B, S5C** and **S5D**). We were able to validate the  
198 expression of three novel miRNAs out of the four chosen ones either with TaqMan<sup>®</sup> assay,  
199 an assay specific for small RNA detection, or with *in situ* hybridization experiments (**Figure**  
200 **4D** and **4E**). Interestingly, nov-72-3p had a higher expression in the germline compared to  
201 let-7-5p and nov-63-3p revealed germline specificity as it was almost 8-fold enriched in the  
202 germline compared to the whole worm (**Figure 4D**). We could not validate nov-82-5p, maybe  
203 due to its low expression. Consistently, our analysis revealed that expression of miRNAs as  
204 measured by qPCR correlates well with the CPMs determined with our sequencing approach  
205 (**Figure S5E**). Interestingly, the loci of nov-63-3p, nov-72-3p and nov-82-5p were found  
206 covered by reads from DCR-1 PAR-CLIP data (Rybak-Wolf et al., 2014) and ALG-1 iPAR  
207 CLIP data (Grosswendt et al., 2014) previously published by our lab (**Table S2**) supporting  
208 the existence and functionality of these novel miRNAs.

209 Further, we investigated whether the novel miRNAs have distinct targets. For this propose,  
210 we used the miRNA:mRNA chimera data generated previously in our lab (Grosswendt et al.,  
211 2014). The chimera data was generated using L3 staged worms which lack a fully developed  
212 germline. Hence, we were not able to find almost any of our novel miRNA candidates in this  
213 data set. However, nov-72-3p revealed an interesting novel interaction pattern as it interacts  
214 not only with mRNAs but also with other already known miRNAs (**Figure S5**). The strongest  
215 interaction was discovered between nov-72-3p and miR-52-5p. The phenomenon of a  
216 miRNA-miRNA duplex was already described by Lai and colleagues in 2004 but lacked so  
217 far experimental evidence (Lai et al., 2004). Their hypotheses were that a miRNA-miRNA  
218 duplex could either protect the single stranded miRNA from degradation or that it tethers the  
219 miRNA away from its putative mRNA targets. However, we did not observe any significant  
220 positive correlation between nov-72-3p and corresponding miRNAs throughout the gonad  
221 (data not shown). As we were able to validate nov-72-3p also in whole worm samples, the  
222 interaction between nov-72-3p and other miRNAs may play an important role in other tissues  
223 of the worm rather than the germline. One main issue with nov-72-3p was that we were not  
224 able to trace back the origin of this novel miRNA as the 20 nt of mature mRNA mapped to  
225 the *dpy-2* locus whereas the first 17 nt also mapped to the locus of *rnm*'s. However, mapping  
226 to the *dpy-2* locus revealed that the seed region of nov-72-3p is strongly conserved amongst  
227 other species (**Figure S5C**).

228 We also found chimeric reads for nov-1-3p. Intriguingly, nov-1-3p and other miRNAs of the  
 229 predicted novel ones harbour a stretch of A's in the seed region, suggesting a potential novel  
 230 class of miRNAs. We validated nov-1-3p with small RNA ISH as TaqMan® probes cannot be  
 231 designed against a stretch of A's due to low complexity (**Figure S5G**). Overall, we detected a  
 232 high fraction of novel miRNAs being localized throughout the germline.  
 233

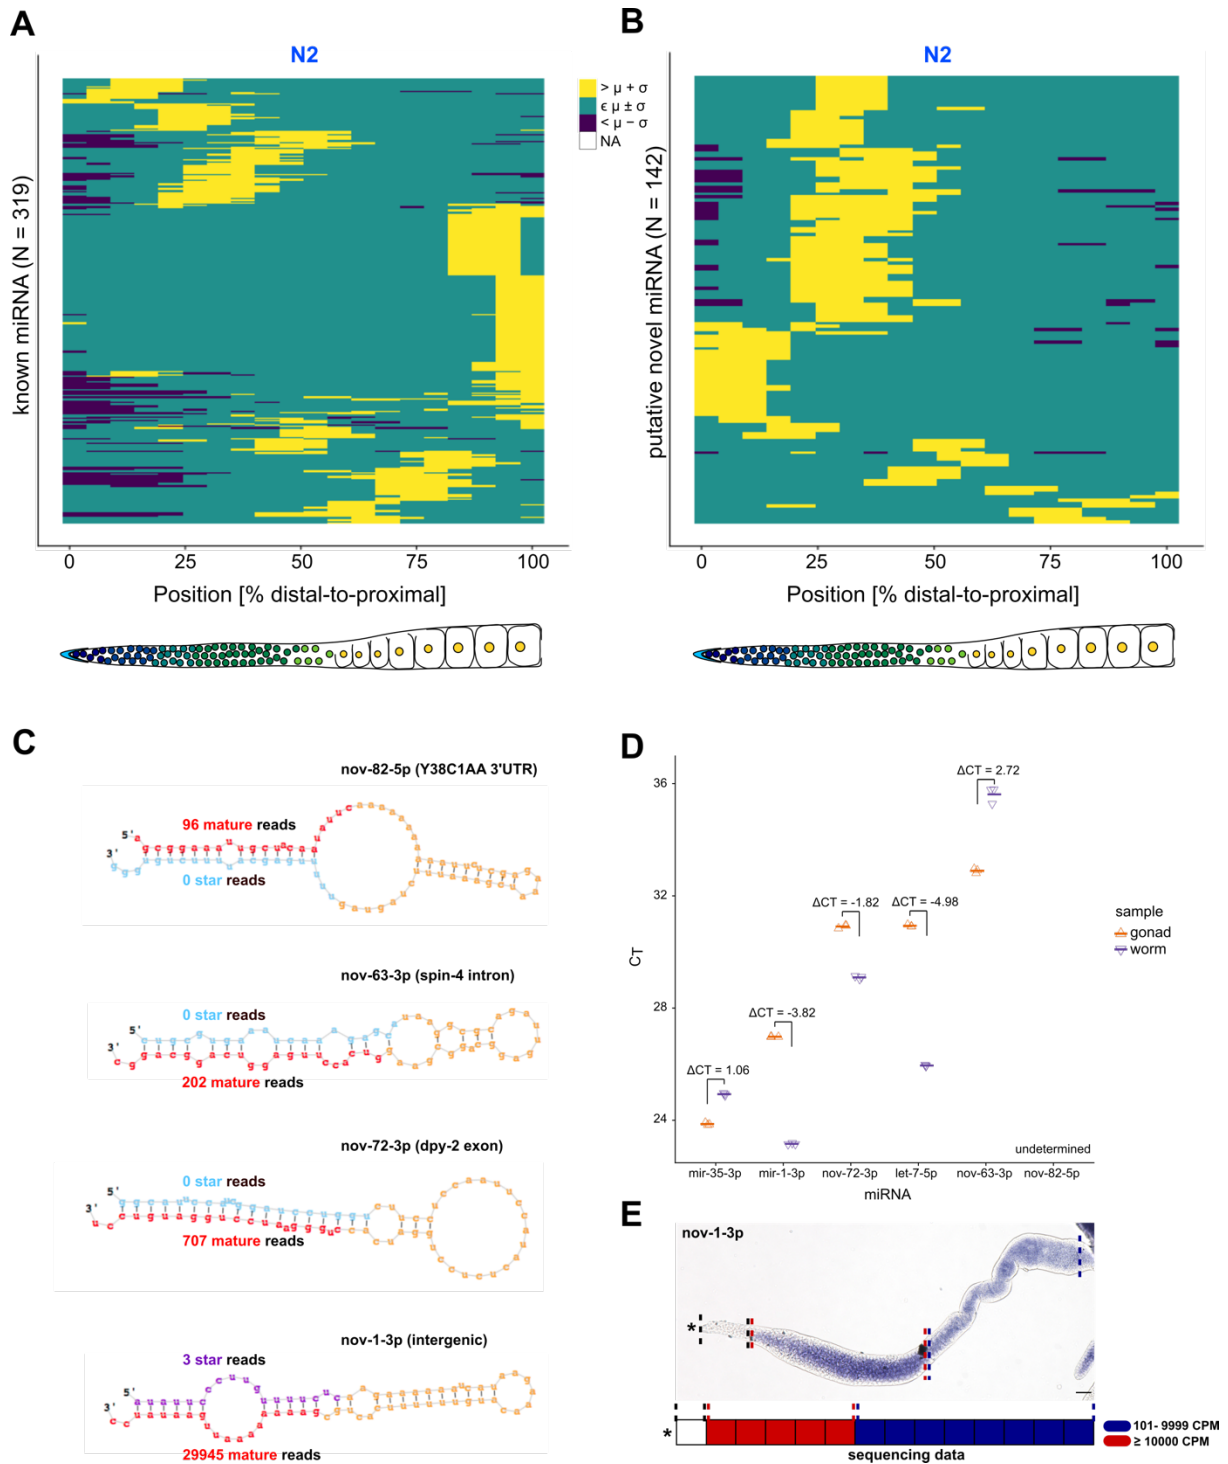

234  
 235  
 236  
 237



238 **Figure 4. Germline-specific small RNA sequencing identifies novel miRNAs**

239 (A) Hierarchical clustering of known miRNAs by linear correlation ( $1 - \text{Pearson's } r$ ) for N2.  $\mu$ , mean;  $\sigma$ , SD.

240 (B) Hierarchical clustering of novel miRNAs by linear correlation ( $1 - \text{Pearson's } r$ ) for N2.  $\mu$ , mean;  $\sigma$ , SD.

241 (C) Four examples of identified novel miRNAs of different *C. elegans* genomic origin. Reduced miRDeep2 plots  
242 show the precursor hairpin structure and the coverage of mature (red), star (blue, violet), and loop (yellow)  
243 sequences.

244 (D) TaqMan<sup>®</sup> assay validation (mean  $C_T$  values) of known miRNAs expressed in *C. elegans* (mir-35-3p, mir-1-3p  
245 and let-7-5p) and novel miRNA predictions (nov-63-3p, nov-72-3p and nov-82-5p). n=3 independent experiments  
246 for gonad and whole worm sample, respectively.

247 (E) *In situ* hybridization (ISH) images of novel miRNA, nov-1-3p with corresponding spatial sequencing data.  
248 Asterisk: DTC. Scale bar: 20  $\mu\text{m}$ .

249 See also Figure S4, S5 and Table S2.

250

251 **A germline-specific miRNA family co-localizes with its putative targets**

252 Based on the discovery that mRNAs and miRNAs revealed similar temporal and spatial  
253 expression patterns across germline, we asked whether expression of miRNAs and their  
254 corresponding targets is co-localized suggesting a putative miRNA:mRNA interaction.  
255 Instead of correlating each miRNA separately with putative targets, we correlated the family-  
256 wise expression summed among family members with the corresponding expression of the  
257 putative target. A miRNA family was defined by the 6mer seed found in the 2-7 nts of the  
258 miRNA members. Putative targets were identified by their 3' UTR carrying at least one 7mer  
259 seed for the 2-8 nts of the miRNA or one 6mer seed for the 2-7 nts of the miRNA provided  
260 opposite the first miRNA nucleotide was an A (Bartel, 2009). We investigated the correlation  
261 for the miR-35 family members that are known to be germline-specific and that localize to the  
262 proximal gonad arm (**Figure 1D, 2D and S2D**). Indeed, we showed that the miR-35-3p is  
263 enriched in the germline compared to whole worm (**Figure 4D**). The analysis revealed that all  
264 miR-35 family members in general correlate positively with their targets, *i.e.*, both classes  
265 showed co-localized expression throughout the germline indicating a germline-specific  
266 interaction (**Figure 5A**). In contrast, miR-1-3p, a non-germline specific miRNA that is  
267 expressed lowly in the germline compared to all miR-35 family members (**Figure 4D**), did not  
268 reveal any prominent co-localization pattern with its targets (**Figure 5A and 5B**). As  
269 expected, miR-1-3p displayed anti-correlation with most of its targets implying an interaction  
270 outside of the germline. Overall our data suggest that germline-specific miRNAs co-localize  
271 with their targets which is a necessity for *in vivo* interaction.

272



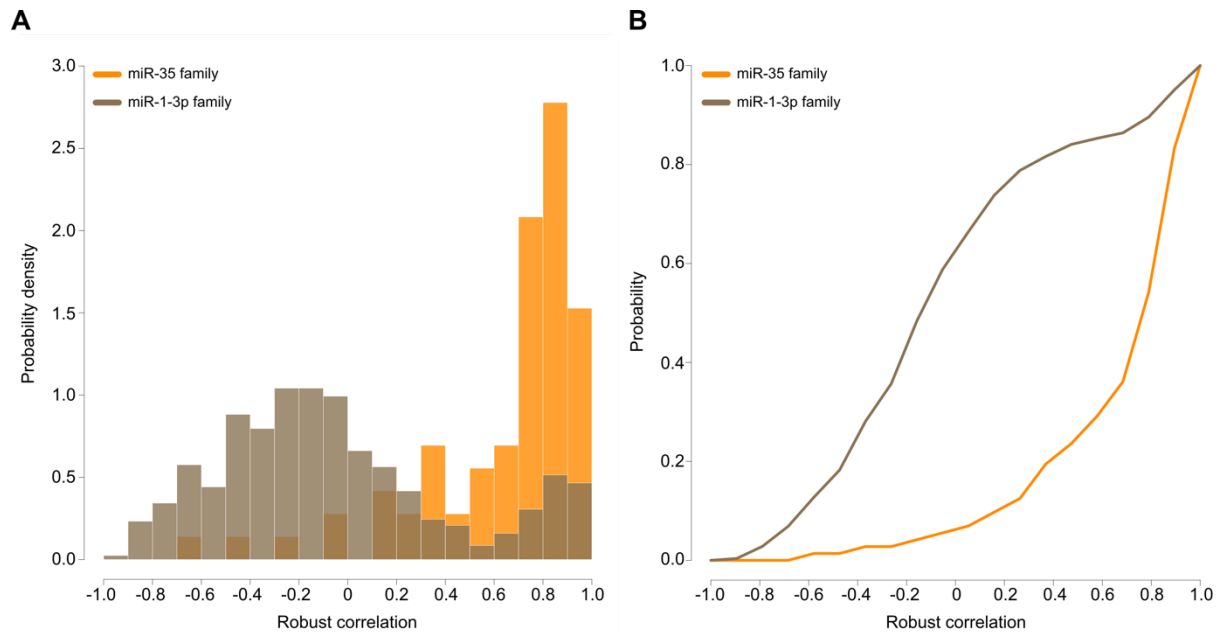

273

274

275 **Figure 5. A germline-specific miRNA family co-localizes with its putative targets**

276 (A) Histogram of robust correlation of miR-35 and miR-1 family members with their putative mRNA targets,  
277 respectively.

278 (B) Density of robust correlation coefficients of miR-35 and miR-1 family members with their putative mRNA  
279 targets, respectively.

280

281 **Hundreds of novel 3'UTR isoforms detected in the germline, and hundreds of 3'UTRs**  
282 **are switched during development**

283 Recent studies suggested that not promoters but 3' UTRs are the main regulators of gene  
284 expression in the *C. elegans* germline (Merritt et al., 2008). Additionally, short 3' UTRs are  
285 mainly expressed in proliferating cells whereas long 3' UTRs are predominantly expressed in  
286 differentiating cells (Mayr and Bartel, 2009; Sandberg et al., 2008; Sood et al., 2006).  
287 Because the germline is divided in proliferating and differentiating cells we aimed to  
288 determine whether genes, expressing more than one isoform, change 3' UTR length across  
289 germline. While most reads, as expected, map to genomic loci annotated as 3' ends of  
290 protein coding genes, we observed several coverage peaks downstream of annotated genes,  
291 suggesting longer 3' UTRs for these transcripts. Hence, we first extended the 3' UTR  
292 annotation (METHODS and **Figure 5A**). We detected 499 intergenic peaks and assigned  
293 them to an upstream gene if the intergenic peak was less than 10 kb downstream (**Figure**  
294 **S6A** and **Table S3**). Of these intergenic peaks, we considered only the ones as novel 3'  
295 UTRs that were less than 3 kb downstream of the assigned gene, leaving 419 candidates  
296 considered as novel 3' UTRs (**Table S3**). Out of the 419 candidates we randomly picked ten  
297 and we were able to validate and confirm the identity of seven of them by Sanger-  
298 sequencing (**Figure S6B, S6C, S6D, S6E** and **S6F**). After annotation of 3' UTRs and further  
299 downstream analysis, we quantified the change of the (relative) 3' UTR usage along the

300 germline for 910 genes. Interestingly, we observed that some of these genes used  
301 predominantly the distal polyadenylation signal (PAS) in the distal gonad arm (longer 3' UTR)  
302 while the proximal PAS (shorter 3' UTR) was used mainly in the proximal arm (**Figure 6B,**  
303 **6C, S6G and S6H**). The switch occurred around the bend region of the gonad where almost  
304 90 % of the cells undergo apoptosis (Hansen and Schedl, 2013). As miRNAs from the miR-  
305 35 family, a germline specific miRNA family, and other miRNAs have their highest expression  
306 around the bend region, *i.e.*, pachytene stage (**Figure 1D, S2D and 4A**), it suggests that  
307 switching from distal to proximal PAS may be a mechanism to evade degradation of the  
308 transcript as longer 3' UTRs usually harbour binding sites for miRNAs or other negative  
309 regulators.

310

### 311 **Differential 3' UTR isoform usage is strongly perturbed in the *gld-2 gld-1* double** 312 **mutant**

313 To better understand the mechanism by which differential 3' UTR usage occurs across the  
314 germline, we examined potential 3' UTR switching candidates in the *gld-2 gld-1* mutant.  
315 Surprisingly, the mutant revealed much less candidates that switch isoform usage (**Figure**  
316 **S6I**). Moreover, the wild type switch of differential isoform usage was generally impaired in  
317 general in the *gld-2 gld-1* mutant (**Figure 6B, 6C, 6D S6G, S6H and 6I**). This switch did not  
318 occur in the *gld-2 gld-1* mutant but instead only the distal PAS was used throughout the  
319 germline. Based on the finding that the differential 3' UTR usage takes place in wild type  
320 gonads and that it is perturbed in the *gld-2 gld-1* mutant, we explored whether factors  
321 involved in regulation of alternative polyadenylation (APA) are perturbed in the mutant, too.  
322 We investigated two factors in more detail, *fipp-1* and *cpsf-4*. *Fipp-1* is an ortholog of the  
323 human FIP1L1 and *cpsf-4* is an ortholog of the human CPSF4L. Both factors are  
324 components of the cleavage and polyadenylation (CPSF) complex that recognize the  
325 canonical PAS (AAUAA) and interact with the poly(A) polymerase and other factors, thereby  
326 inducing cleavage and polyadenylation (Kaufmann et al., 2004). Hence, both factors play a  
327 key role in the pre-mRNA 3' end formation and APA. Interestingly, we observed that in the  
328 wild type both factors increased expression towards the proximal arm and peak around the  
329 bend region (**Figure 6E**). This is in line with the fact that the switch from distal to proximal  
330 PAS occurred around the bend region, too. Strikingly, the expression of both factors did not  
331 increase towards the proximal arm in the *gld-2 gld-1* mutant but stayed rather constant or  
332 increased slightly compared to the wild type (**Figure 6E**). This suggests that the level of  
333 these two factors may be important for the switch between distal and proximal PAS usage.  
334 Altogether our data showed that differential 3' UTR usage is highly regulated in the germline  
335 and it indicates that the level of certain factors involved in APA may be important for the  
336 differential 3' UTR usage.

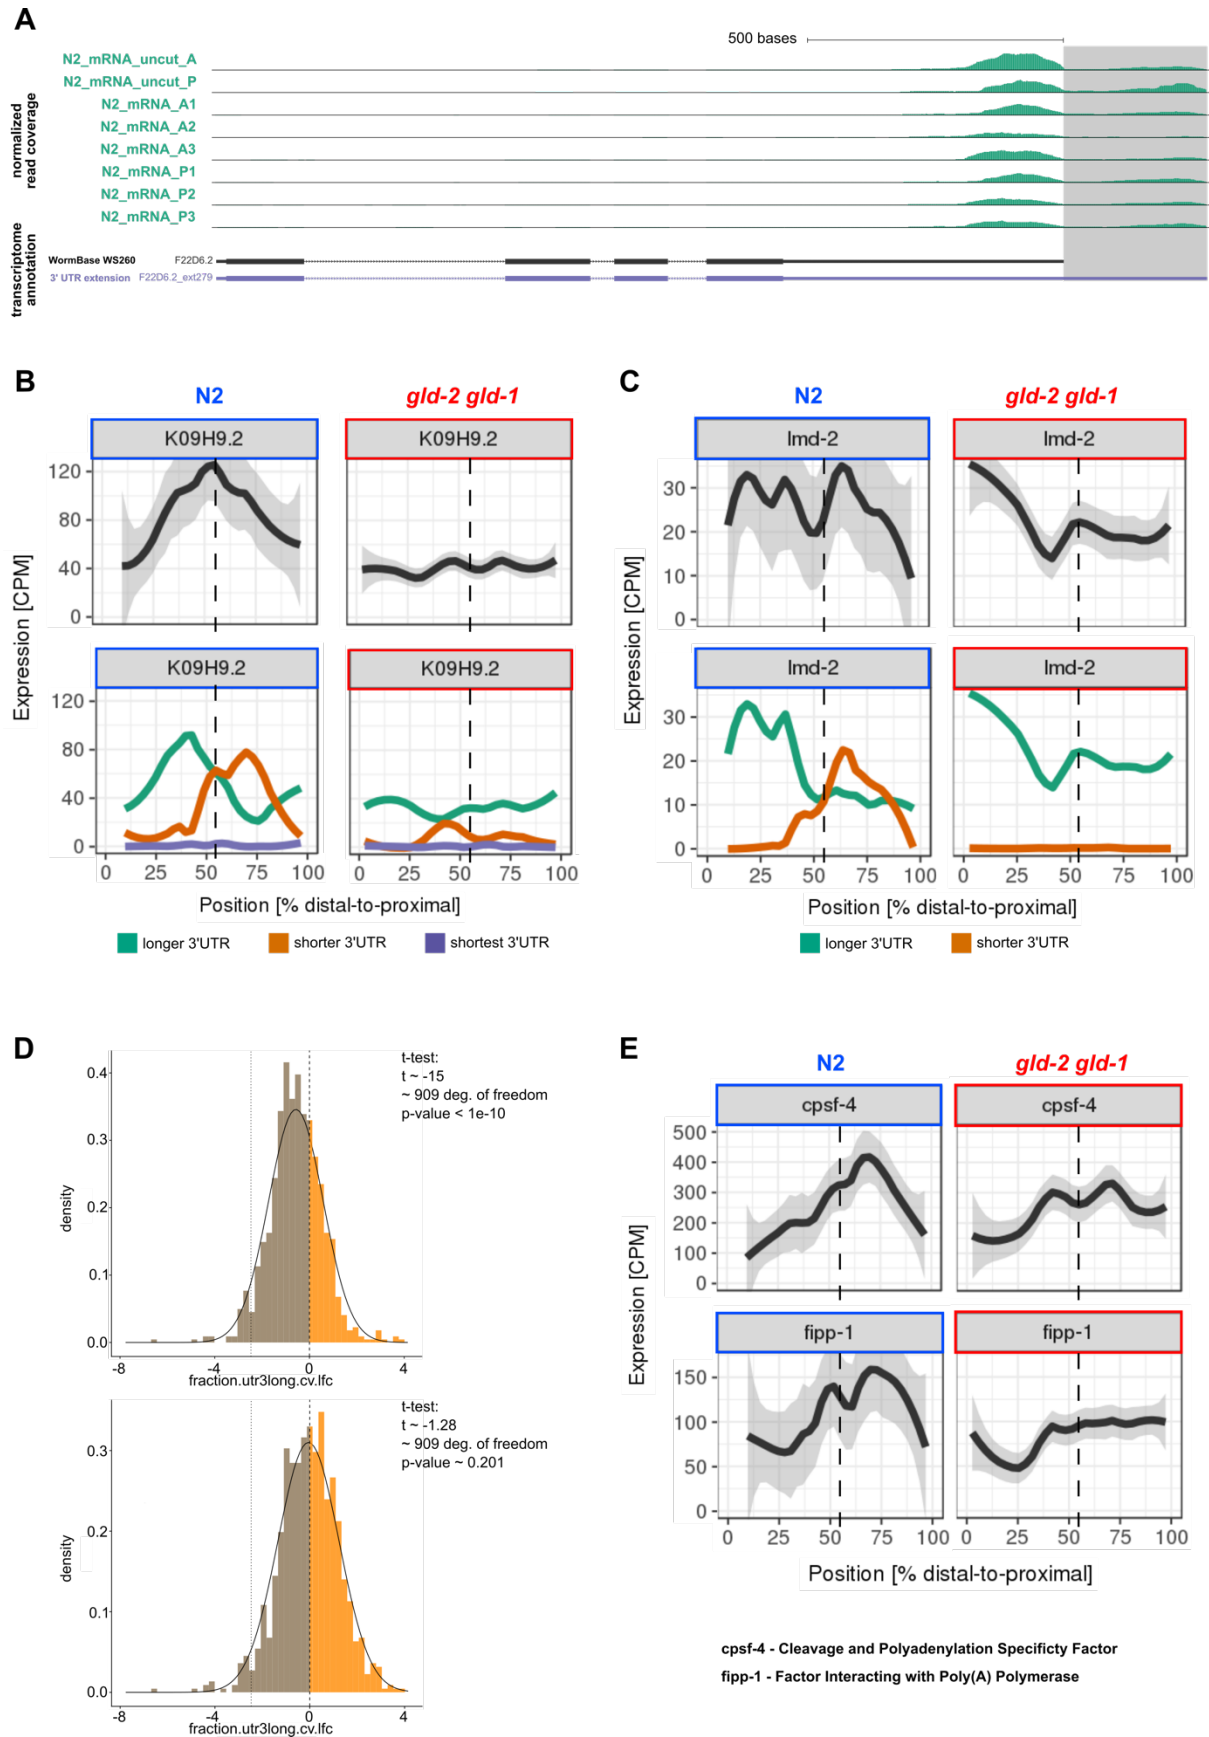

337

338

339

340

**Figure 6. Differential 3' UTR isoform usage in the germline is perturbed in the *gld-2 gld-1* double mutant**  
 (A) Genome browser track example gene with downstream extension of the annotated 3' UTR.

341 (B) Spatial expression of K09H9.2 in wild type N2 and *gld-2 gld-1* double mutant from distal-to-proximal at gene  
342 and isoform level. n=6 independent experiments for N2 and n=4 for *gld-2 gld-1*, LOESS  $\pm$  SE for gene level and  
343 LOESS only for isoform level. Longest 3' UTR is marked in turquoise, shorter 3' UTR in orange and the shortest  
344 3' UTR in purple. Dashed line, bend/loop region of the germline.

345 (C) Spatial expression of *lmd-2* in wild type N2 and *gld-2 gld-1* double mutant from distal-to-proximal at gene and  
346 isoform level. n=6 independent experiments for N2 and n=4 for *gld-2 gld-1*, LOESS  $\pm$  standard error (SE) for gene  
347 level and LOESS only for isoform level. Longest 3' UTR is marked in turquoise and shorter 3' UTR in orange.  
348 Dashed, bend/loop region of the germline.

349 (D) Summary of log-CV (coefficient of variation) changes on a per-gene level between N2 and *gld-2 gld-1* double  
350 mutant. Lower panel shows the negative control with shuffled genotype assignments of the CVs. Left dashed line,  
351 the 5<sup>th</sup> percentile of the shuffled control normal fit.

352 (E) Spatial expression of *cpsf-4* and *fipp-1* in wild type N2 and *gld-2 gld-1* double mutant from distal-to-proximal.  
353 n=6 independent experiments for N2 and n=4 for *gld-2 gld-1*, LOESS  $\pm$  SE. Dashed line marks the bend/loop  
354 region of the germline.

355 See also Figure S6 and Table S3.

356

### 357 **SPACEGERM: a user-friendly interface for exploring spatial expression in the germline**

358 We have shown how the spatially-resolved expression data generated in this study provide  
359 new insights into the mechanistic coordination of fundamental processes in biology. Clearly,  
360 these data have the potential to inform a multitude of additional studies focussing on various  
361 specific biological questions. To enable other researchers to conveniently utilize our data for  
362 their studies, and to provide a “universal” coordinate system, we developed SPACEGERM  
363 (Spatial C. e*legans* germline expression of mRNA and miRNA), an interactive data  
364 visualization tool for exploring the spatial expression data in the germline (**Figure S7**). The  
365 tool allows the user to investigate the spatial expression of every gene, isoform or miRNA  
366 detected in our data sets. The user can choose between wild type and mutant samples and  
367 have a closer look at the raw data points or the smooth fits (LOESS) across all replicates.  
368 SPACEGERM also allows to examine a set of genes by uploading an Excel file with gene  
369 name IDs, again for every genotype and gene type. Alternatively, one can investigate all  
370 genes detected with our sequencing approach up to 500 genes at once. Furthermore, the  
371 user can also download an Excel file with information about genes, their expression on  
372 average, their minimal and maximal expression value and location and cluster assignment.  
373 Finally, the reconstructed 3D germline can be explored concerning *in vivo* RNA expression  
374 throughout germ cell proliferation and differentiation ('virtual *in situ* hybridization' (vISH)).

375

## 1 **DISCUSSION**

2 By rapidly dissecting, shock-freezing and cryo-cutting the *Caenorhabditis elegans* germline  
3 at 50  $\mu$ m resolution and sequencing each slice separately, we create the first spatially  
4 resolved RNA expression map of wild type and mRNA expression map of mutant animal  
5 germlines. Additionally, we were able to reconstruct an *in silico* 3D germline model, that can  
6 be used to perform virtual *in situ* hybridizations and/or interrogate RNA localization of almost  
7 all transcripts during germ cell proliferation and differentiation (**Figure 2**).

8

### 9 **A mechanistic model of spatial gene expression regulation**

10 We recovered the expression profile of *rpl* and *rps* genes, which encode for ribosomal  
11 subunits and are mainly localized to the distal gonad arm and slowly decrease in expression  
12 towards the proximal arm (**Figure 3**) (West et al., 2018). Interestingly, the same genes did  
13 not decrease in expression in the *gld-2 gld-1* double mutant but were constantly expressed  
14 throughout the germline (**Figure 3**). The *gld-2 gld-1* double mutant reveals only a third of the  
15 meiotic entry, *i.e.*, germ cells fail to differentiate and proliferate instead constantly throughout  
16 the germline (Brenner and Schedl, 2016; Kadyk and Kimble, 1998). However, genes involved  
17 in the deregulation of the proliferation and differentiation balance in the *gld-2 gld-1* mutant  
18 remain poorly discovered. In this study, we propose that PIE-1, a repressor of RNA  
19 polymerase II dependent gene expression that is important for germline cell fate  
20 determination (Seydoux and Dunn, 1997; Seydoux et al., 1996; Tenenhaus et al., 2001), is a  
21 potential key player that regulates the balance between proliferation and differentiation in the  
22 *C. elegans* germline (**Figure 7A**). The *pie-1* gene encodes a maternal CCCH finger protein  
23 which is specific for oocytes and embryos (Merritt et al., 2008; Tenenhaus et al., 2001).  
24 However, previous studies showed that the *pie-1* promoter allows expression in all germ cell  
25 types (D'Agostino et al., 2006; Merritt et al., 2008). Previous studies showed that *pie-1* is a  
26 target of GLD-2, the main cytoplasmic poly(A) polymerase (cytoPAP) in the germline (Kadyk  
27 and Kimble, 1998; Kim et al., 2010; Wang et al., 2009). Furthermore, Kim and colleagues  
28 showed that depletion of GLD-2 alone was sufficient to lower the abundance of most of its  
29 targets as these transcripts do not get polyadenylated and are therefore degraded (Kim et  
30 al., 2010). We showed that *pie-1* is mainly localized around the pachytene stage and that it  
31 has its highest expression during early oogenesis, exactly where the GLD-2 protein has its  
32 highest abundance (Millonigg et al., 2014). In accordance with this fact, the germline  
33 becomes transcriptionally silent from the late stage oogenesis (diagenesis) up to the forth  
34 cell-stage embryo (Evsikov et al., 2006; Stoeckius et al., 2014) suggesting that PIE-1 could  
35 play a key role in repressing the transcription as it does in the blastomere development.  
36 Indeed, many genes like the *rpl* and *rps* genes decrease in expression towards the proximal  
37 gonad arm supporting the hypothesis that PIE-1 is involved in transcriptional repression of

38 these genes. In line with this hypothesis, when *pie-1* is downregulated in the *gld-2 gld-1*  
39 double mutant, *rpl* and *rps* genes are constantly expressed throughout the germline  
40 potentially inducing the observed phenotype of constant proliferation of germ cells.  
41 Additionally, previous expression studies of PIE-1 in HeLa cells reported that PIE-1 can  
42 inhibit transcription directly, suggesting a conserved mechanism (Batchelder et al., 1999). As  
43 PIE-1 is also detected in the cytoplasm, mainly in association with P granules (Mello et al.,  
44 1996; Tenenhaus et al., 2001), it was suggested that PIE-1 is required for the maintenance  
45 of *nos-2* and possibly other class II mRNAs, RNAs that are associated with P granules  
46 (Seydoux and Fire, 1994; Tenenhaus et al., 2001). Indeed, our data revealed that *nos-2* and  
47 *cey-2*, two examples of class II mRNAs, increase in expression as *pie-1* expression  
48 increases in the proximal arm in the wild type. The same mRNAs are down-regulated in the  
49 *gld-2 gld-1* mutant. This suggests that the downregulation of these class II mRNAs impede  
50 differentiation as the *gld-2 gld-1* mutant lacks differentiation which results in a sterile  
51 phenotype. Interestingly, RNA interference (RNAi) of *pie-1* revealed many phenotypes,  
52 including a sterile phenotype as in the *gld-2 gld-1* mutant (Melo and Ruvkun, 2012).  
53 However, meiotic entry and differentiation is only perturbed in *gld-2 gld-1* double mutants,  
54 *i.e.*, meiotic entry appears normally in mutants lacking either *gld-1* or *gld-2* (single mutants)  
55 (Brenner and Schedl, 2016). Hence, we cannot exclude other regulators and the regulation  
56 via *gld-1* as most of the GLD-1 targets are downregulated in our data. Furthermore, the  
57 relationship between *gld-1* in its role in the distal meiotic entry decision and its role further  
58 down in the germline is complex as loss of *cye-1* and *cdk-2*, two important regulators of the  
59 mitotic cell cycle, causes the germline tumours still to differentiate (Fox et al., 2011).

60

### 61 **The choice of 3' UTR is strongly regulated in the *C. elegans* germline**

62 Merritt and colleagues already reported that 3' UTRs and not promoters are the main drivers  
63 of gene expression in the germline (Merritt et al., 2008). Other studies also suggested that  
64 there might be a switch of 3' UTR usage between proliferative and differentiating cells, more  
65 precisely, cells that proliferate use mainly the proximal alternative polyadenylation site (PAS,  
66 short 3' UTR) while differentiating cells use predominantly the distal PAS (long 3' UTR) (Mayr  
67 and Bartel, 2009; Sandberg et al., 2008; Sood et al., 2006). However, *in vivo* studies of  
68 differential 3' UTR isoform usage remain still poorly investigated. Our sequencing approach  
69 does not offer the coverage and resolution to generally distinguish between different isoforms  
70 of one gene. This is because we sequence approximately 500 nt fragments while the mean  
71 3' UTR length of *C. elegans* transcripts is 211 nt (Jan et al., 2011; Mangone et al., 2010).  
72 Nonetheless, we succeeded in quantifying the change of the (relative) 3' UTR usage along  
73 the germline for almost 1000 genes. It is important to note that due to our technical  
74 limitations, this number is almost certainly only a fraction of all 3' UTR length switches.



75 Among these candidates, we observed genes that mainly used the proximal PAS in the distal  
76 gonad arm while the distal PAS was used in the proximal arm (**Figure 6** and **S6**). Our data  
77 revealed that *cpsf-4* (Cleavage and Polyadenylation Specificity Factor) and *fipp-1* (Factor  
78 Interacting with Poly(A) Polymerase), have their highest expression around the pachytene  
79 stage. This is exactly where the switch of differential 3' UTR usage occurs (**Figure 6** and **S6**).  
80 Those two genes are known main regulators of APA in the *C. elegans* germline. They are  
81 probably the key spatial regulators, as other APA factors are lower abundant, less localized,  
82 and importantly, not perturbed in the mutants (see SPACEGERM). Furthermore, we  
83 discovered that these two factors are constantly expressed in the *gld-2 gld-1* double mutant  
84 leading to the failure of 3' UTR length switching (**Figure 6** and **S6**). Additionally, the  
85 expression levels of the APA factors in the mutant were similar to those in the very distal  
86 gonad arm of the wild type. Our data suggest that the expression level of APA factors is  
87 crucial for the differential 3' UTR usage and hence the switch between proliferation and  
88 differentiation during germline development. Lackford and colleagues already observed a  
89 similar phenomenon where alternative polyadenylation (APA) depends on the level of  
90 different factors involved in APA such as Fip1, an mRNA 3' processing factor, and CPSF, a  
91 cleavage and polyadenylation specificity factor (Lackford et al., 2014). It is thought that  
92 generally the distal PAS is stronger than the proximal one, leading to the predominant usage  
93 of the distal PAS if the level of APA factors is low (Lackford et al., 2014). Thus, we propose  
94 that the spatial concentration of factors involved in APA are important for differential 3' UTR  
95 usage along the germline and hence controlling proliferation versus differentiation (**Figure**  
96 **7B**). Furthermore, the *gld-2 gld-1* mutant indicated that deregulation of the levels of factors  
97 involved in APA perturb the differential 3' UTR usage and therefore may disturb the  
98 proliferation and differentiation balance. In general, the *gld-2 gld-1* mutant showed globally  
99 decreased 3' UTR variability in the germline compared to the wild type. It remains still to be  
100 investigated what factors or pathways regulate the level of the factors involved in APA  
101 regulation and if mRNA expression level of APA factors mirrors the corresponding spatial  
102 protein expression. Furthermore, an approach is needed that increases the resolution to  
103 distinguish between different isoform of a gene in a spatial resolved manner. This will help to  
104 determine the total number of genes that follow our differential 3' UTR usage hypothesis  
105 (**Figure 7B**).



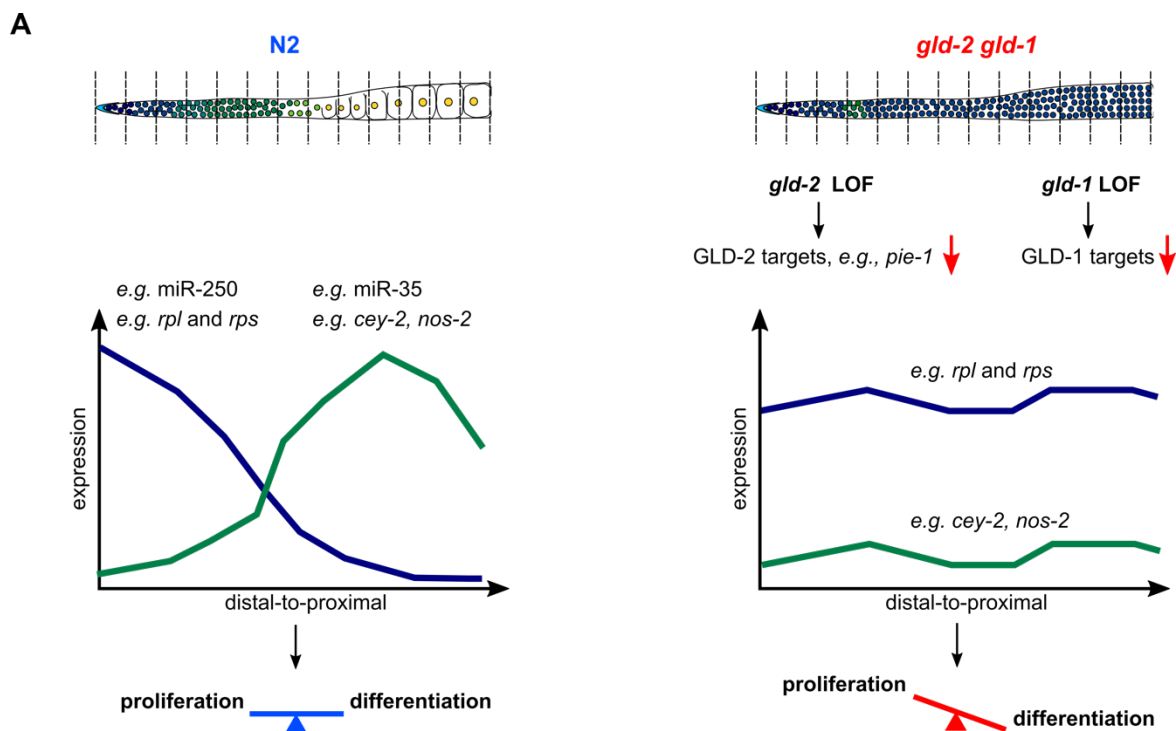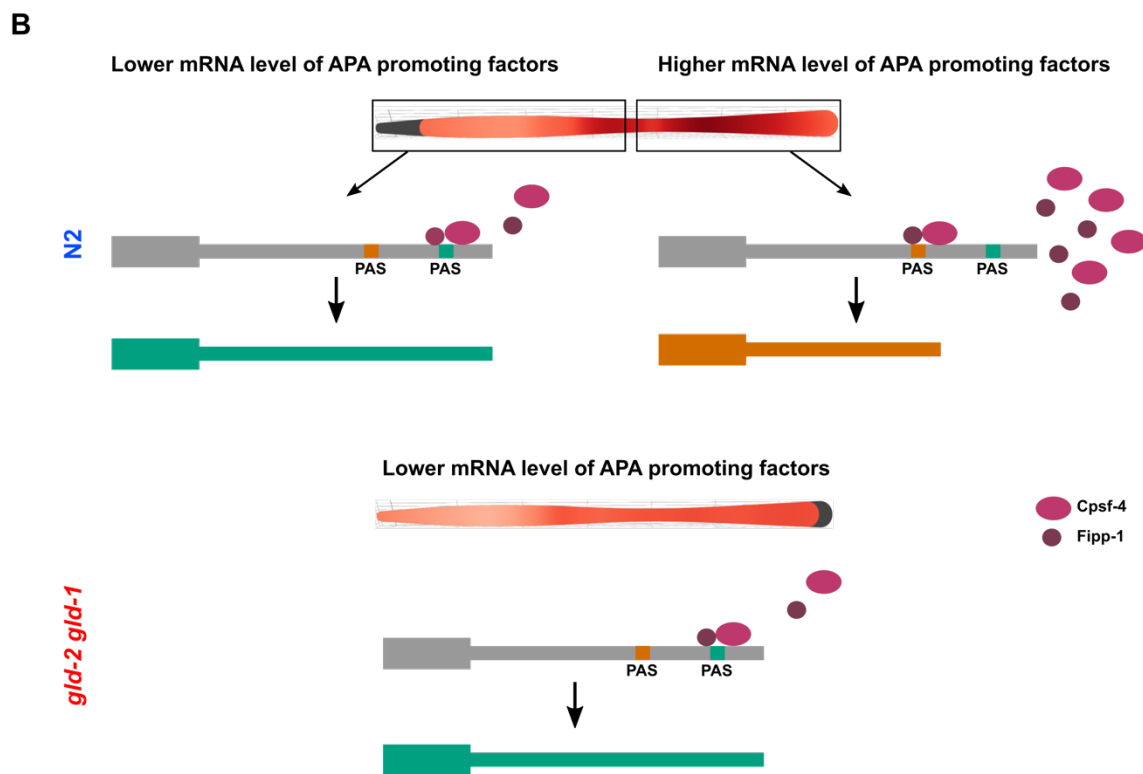

106  
107  
108  
109

110 **Figure 7. Model for spatially restricted gene expression and differential 3' UTR isoform usage in the**  
111 **germline**

112 (A) Schematic overview of mRNA and miRNA localization in wild type and mRNA localization in *gld-2 gld-1*  
113 double mutant germline, indicating putative regulators of spatial restricted gene expression. LOF, loss of function.

114 (B) Model for differential 3' UTR isoform usage across the germline. Depending on the concentration of *cpsf-4*  
115 (*vISH* is shown) and *fipp-1*, two factors involved in alternative polyadenylation (APA), some genes use the longer  
116 3' UTR isoform in the distal gonad arm while the shorter one is used in the proximal gonad arm. In *gld-2 gld-1*  
117 double mutants only the longer 3' UTR isoform is used.

118

119 **miRNA expression is spatially organized and co-localizes with germline targets**

120 Besides 3' UTRs being important regulators of gene expression in the *C. elegans* germline,  
121 previous studies also suggested that miRNAs control proliferation and differentiation in *C.*  
122 *elegans* (Bukhari et al., 2012; Ding et al., 2008). We comprehensively analysed spatial  
123 expression of known miRNAs in the *C. elegans* germline. miRNAs were found in distinct  
124 localization patterns along the germline with the miR-35 family, the main miRNA family in the  
125 germline, being localized in the pachytene region (**Figure 1** and **4**), consistent with the  
126 previous study done by McEwan and colleagues (McEwen et al., 2016). Furthermore, we  
127 showed that all members of the miR-35 family and their targets were co-localized throughout  
128 the germline, a requirement for functional interaction *in vivo* (**Figure 5A**). One could  
129 speculate about a threshold function of the miR-35 family. In this case the miRNAs would  
130 keep the expression of their targets at a threshold level below which protein production is  
131 inhibited (Mukherji et al., 2011; Sood et al., 2006). In contrast, non-germline-specific miRNAs  
132 such as miR-1-3p did not show any predominant co-localization with their targets suggesting  
133 an interaction outside of the germline (**Figure 5A** and **5B**).

134

135 **Identification of 83 novel miRNAs with specific spatial localization**

136 In addition, we discovered 83 novel precursor miRNAs and validated three of them (**Figure 4**  
137 and **S5**). We note that some of these miRNAs have a limited spatial expression domain but  
138 are well expressed within this domain. This is probably the reason why they escaped  
139 detection in previous studies. Interestingly, we identified an unusual novel miRNA, nov-72-  
140 3p, that (as we can show by chimera-analysis) binds other miRNAs, creating a miRNA-  
141 miRNA duplex (**Figure S5F**). This phenomenon was predicted by Lai and colleagues in 2004  
142 computationally but so far lacked experimental evidence (Lai et al., 2004). Their hypotheses  
143 were that the miRNA-duplex could either stabilize the miRNA by protecting it from  
144 degradation or the miRNA could be tethered away from its targets and therefore stabilizing  
145 the mRNA targets (Lai et al., 2004). However, we were not able to define the genomic locus  
146 of nov-72-3p as the mature miRNA mapped antisense to the exon of the *dpy-2* locus but the  
147 first 17 nt of the mature miRNA also mapped to ribosomal RNA transcripts. Hence, the locus  
148 remains still undetermined impeding further analysis of nov-72-3p.

149

## 150 **Public availability of all data via interactive web application “SPACEGERM”**

151 Finally, we developed an interactive data visualization tool, named SPACEGERM (*S*patial *C*.  
152 *e*legans germline *e*xpression of m*R*NA and mi*R*NA) for exploring the spatial expression in  
153 the germline in well defined, “universal” coordinates, both as raw data and projected (“virtual  
154 *in situ* hybridization”) on our 3D model (**Figure S7**).

155

156 Overall, we have presented a first map of germline RNA at unprecedented spatial resolution.  
157 This near single cell resolution was key for (1) discovering numerous of new miRNAs and  
158 hundreds of new 3’ UTRs (2) beginning to interpret the spatial patterns and (3) identifying, by  
159 comparison to mutant germlines, regulators and mechanisms that appear to play key roles in  
160 regulating germline biology. We believe that comparison to more mutants will dramatically  
161 improve our understanding of this beautiful system. Of course, much more measurements  
162 will need to be done as we currently only quantify RNA, and even for RNA we miss a lot of  
163 information – subcellular localization, methylation, polyadenylation states and many more.  
164 However, we hope that our 3D model and data help to set a common reference which can be  
165 expanded in the future.

166

## 167 **AUTHOR CONTRIBUTIONS**

168 A.D. and N.R. conceived and designed the project. A.D. established and led the  
169 development of the project. A.D. performed the experiments and wrote (with N.R.) the  
170 manuscript, with input from other authors. M.S. analysed the mRNA data, designed the  
171 interactive data visualization tool and constructed the 3D germline model. F.K. analysed the  
172 small RNA data. S.A. helped with the establishment of the small RNA protocol. A.D. and N.R.  
173 led the interpretation of the data. N.R. supervised the project.

174

## 175 **ACKNOWLEDGMENTS**

176 We thank J. P. Junker and B. Tursun for helpful discussions. We also thank the sequencing  
177 facility of the Sauer group at the BIMS/MDC. We are grateful to M. Herzog for helping with  
178 the gonad dissection. We thank J. Hubbard for helpful discussions. We thank A. Filipchuk for  
179 identifying the chimeric interactions of nov-72-3p in the small RNA sequencing libraries. A.D.  
180 was a member of the Computational Systems Biology (CSB) graduate school which is  
181 funded by Deutsche Forschungsgemeinschaft (DFG). M.S. was funded by DFG and MDC.  
182 F.K. was funded by Deutsches Epigenom Programm (DEEP).

183

## 184 **DECLARATION OF INTEREST**

185 The authors declare no competing interests.

186 **REFERENCES**

187

188 Bartel, D.P. (2009). MicroRNAs: target recognition and regulatory functions. *Cell* 136, 215–  
189 233.

190

191 Bartel, D.P. (2018). Metazoan MicroRNAs. *Cell* 173, 20–51.

192

193 Batchelder, C., Dunn, M.A., Choy, B., Suh, Y., Cassie, C., Shim, E.Y., Shin, T.H., Mello, C.,  
194 Seydoux, G., and Blackwell, T.K. (1999). Transcriptional repression by the *Caenorhabditis*  
195 *elegans* germ-line protein PIE-1. *Genes Dev.* 13, 202–212.

196

197 Brenner, J.L., and Schedl, T. (2016). Germline Stem Cell Differentiation Entails Regional  
198 Control of Cell Fate Regulator GLD-1 in *Caenorhabditis elegans*. *Genetics* 202, 1085–1103.

199

200 Brumbaugh, J., Di Stefano, B., Wang, X., Borkent, M., Forouzmand, E., Clowers, K.J., Ji, F.,  
201 Schwarz, B.A., Kalocsay, M., Elledge, S.J., et al. (2018). Nudt21 controls cell fate by  
202 connecting alternative polyadenylation to chromatin signaling. *Cell* 172, 106–120.e21.

203

204 Bukhari, S.I.A., Vasquez-Rifo, A., Gagné, D., Paquet, E.R., Zetka, M., Robert, C., Masson,  
205 J.-Y., and Simard, M.J. (2012). The microRNA pathway controls germ cell proliferation and  
206 differentiation in *C. elegans*. *Cell Res.* 22, 1034–1045.

207

208 Buxbaum, A.R., Haimovich, G., and Singer, R.H. (2015). In the right place at the right time:  
209 visualizing and understanding mRNA localization. *Nat. Rev. Mol. Cell Biol.* 16, 95–109.

210 Bystrykh, L.V. (2012). Generalized DNA barcode design based on Hamming codes. *PLoS*  
211 *One* 7, e36852.

212

213 Crittenden, S.L., Leonhard, K.A., Byrd, D.T., and Kimble, J. (2006). Cellular analyses of the  
214 mitotic region in the *Caenorhabditis elegans* adult germ line. *Mol. Biol. Cell* 17, 3051–3061.

215

216 D'Agostino, I., Merritt, C., Chen, P.-L., Seydoux, G., and Subramaniam, K. (2006).  
217 Translational repression restricts expression of the *C. elegans* Nanos homolog NOS-2 to the  
218 embryonic germline. *Dev. Biol.* 292, 244–252.

219

220 Dard-Dascot, C., Naquin, D., d'Aubenton-Carafa, Y., Alix, K., Thermes, C., and van Dijk, E.  
221 (2018). Systematic comparison of small RNA library preparation protocols for next-  
222 generation sequencing. *BMC Genomics* 19, 118.

- 223 Ding, X.C., Slack, F.J., and Grosshans, H. (2008). The let-7 microRNA interfaces extensively  
224 with the translation machinery to regulate cell differentiation. *Cell Cycle* 7, 3083–3090.  
225
- 226 Evsikov, A.V., Graber, J.H., Brockman, J.M., Hampl, A., Holbrook, A.E., Singh, P., Eppig,  
227 J.J., Solter, D., and Knowles, B.B. (2006). Cracking the egg: molecular dynamics and  
228 evolutionary aspects of the transition from the fully grown oocyte to embryo. *Genes Dev.* 20,  
229 2713–2727.  
230
- 231 Fox, P.M., Vought, V.E., Hanazawa, M., Lee, M.-H., Maine, E.M., and Schedl, T. (2011).  
232 Cyclin E and CDK-2 regulate proliferative cell fate and cell cycle progression in the *C.*  
233 *elegans* germline. *Development* 138, 2223–2234.  
234
- 235 Francis, R., Maine, E., and Schedl, T. Analysis of the Multiple Roles of *gld-I* in Germline  
236 Development: Interactions.  
237
- 238 Friedländer, M.R., Mackowiak, S.D., Li, N., Chen, W., and Rajewsky, N. (2012). miRDeep2  
239 accurately identifies known and hundreds of novel microRNA genes in seven animal clades.  
240 *Nucleic Acids Res.* 40, 37–52.  
241
- 242 Gartner, A., Boag, P.R., and Blackwell, T.K. (2008). Germline survival and apoptosis.  
243 *WormBook* 1–20.  
244
- 245 Grosswendt, S., Filipchuk, A., Manzano, M., Klironomos, F., Schilling, M., Herzog, M.,  
246 Gottwein, E., and Rajewsky, N. (2014). Unambiguous identification of miRNA:target site  
247 interactions by different types of ligation reactions. *Mol. Cell* 54, 1042–1054.  
248
- 249 Hansen, D., and Schedl, T. (2013). Stem cell proliferation versus meiotic fate decision in  
250 *Caenorhabditis elegans*. *Adv. Exp. Med. Biol.* 757, 71–99.  
251
- 252 Hashimshony, T., Wagner, F., Sher, N., and Yanai, I. (2012). CEL-Seq: single-cell RNA-Seq  
253 by multiplexed linear amplification. *Cell Rep.* 2, 666–673.  
254
- 255 Hashimshony, T., Senderovich, N., Avital, G., Klochendler, A., de Leeuw, Y., Anavy, L.,  
256 Gennert, D., Li, S., Livak, K.J., Rozenblatt-Rosen, O., et al. (2016). CEL-Seq2: sensitive  
257 highly-multiplexed single-cell RNA-Seq. *Genome Biol.* 17, 77.  
258
- 259 Hirsh, D., Oppenheim, D., and Klass, M. (1976). Development of the reproductive system of

260 *Caenorhabditis elegans*. *Dev. Biol.* 49, 200–219.

261

262 Hubbard, E.J.A. (2007). *Caenorhabditis elegans* germ line: a model for stem cell biology.

263 *Dev. Dyn.* 236, 3343–3357.

264

265 Jan, C.H., Friedman, R.C., Ruby, J.G., and Bartel, D.P. (2011). Formation, regulation and

266 evolution of *Caenorhabditis elegans* 3'UTRs. *Nature* 469, 97–101.

267

268 Jansen, R.P. (2001). mRNA localization: message on the move. *Nat. Rev. Mol. Cell Biol.* 2,

269 247–256.

270

271 Jones, A.R., Francis, R., and Schedl, T. (1996). GLD-1, a cytoplasmic protein essential for

272 oocyte differentiation, shows stage- and sex-specific expression during *Caenorhabditis*

273 *elegans* germline development. *Dev. Biol.* 180, 165–183.

274

275 Jungkamp, A.-C., Stoeckius, M., Mecnas, D., Grün, D., Mastrobuoni, G., Kempa, S., and

276 Rajewsky, N. (2011). In vivo and transcriptome-wide identification of RNA binding protein

277 target sites. *Mol. Cell* 44, 828–840.

278

279 Junker, J.P., Noël, E.S., Guryev, V., Peterson, K.A., Shah, G., Huisken, J., McMahon, A.P.,

280 Berezikov, E., Bakkers, J., and van Oudenaarden, A. (2014). Genome-wide RNA

281 Tomography in the zebrafish embryo. *Cell* 159, 662–675.

282

283 Kadyk, L.C., and Kimble, J. (1998). Genetic regulation of entry into meiosis in *Caenorhabditis*

284 *elegans*. *Development* 125, 1803–1813.

285

286 Kaufmann, I., Martin, G., Friedlein, A., Langen, H., and Keller, W. (2004). Human Fip1 is a

287 subunit of CPSF that binds to U-rich RNA elements and stimulates poly(A) polymerase.

288 *EMBO J.* 23, 616–626.

289

290 Kim, K.W., Wilson, T.L., and Kimble, J. (2010). GLD-2/RNP-8 cytoplasmic poly(A)

291 polymerase is a broad-spectrum regulator of the oogenesis program. *Proc. Natl. Acad. Sci.*

292 *USA* 107, 17445–17450.

293

294 Koller, M., and Stahel, W.A. (2011). Sharpening Wald-type inference in robust regression for

295 small samples. *Comput. Stat. Data Anal.* 55, 2504–2515.

296

297 Lackford, B., Yao, C., Charles, G.M., Weng, L., Zheng, X., Choi, E.-A., Xie, X., Wan, J., Xing,  
298 Y., Freudenberg, J.M., et al. (2014). Fip1 regulates mRNA alternative polyadenylation to  
299 promote stem cell self-renewal. *EMBO J.* 33, 878–889.  
300  
301 Lai, E.C., Wiel, C., and Rubin, G.M. (2004). Complementary miRNA pairs suggest a  
302 regulatory role for miRNA:miRNA duplexes. *RNA* 10, 171–175.  
303  
304 Maciejowski, J., Ugel, N., Mishra, B., Isopi, M., and Hubbard, E.J.A. (2006). Quantitative  
305 analysis of germline mitosis in adult *C. elegans*. *Dev. Biol.* 292, 142–151.  
306  
307 Mangone, M., Manoharan, A.P., Thierry-Mieg, D., Thierry-Mieg, J., Han, T., Mackowiak,  
308 S.D., Mis, E., Zegar, C., Gutwein, M.R., Khivansara, V., et al. (2010). The landscape of *C.*  
309 *elegans* 3'UTRs. *Science* (80-. ). 329, 432–435.  
310  
311 Martin, K.C., and Ephrussi, A. (2009). mRNA localization: gene expression in the spatial  
312 dimension. *Cell* 136, 719–730.  
313  
314 Mayr, C. (2017). Regulation by 3'-Untranslated Regions. *Annu. Rev. Genet.* 51, 171–194.  
315  
316 Mayr, C., and Bartel, D.P. (2009). Widespread shortening of 3'UTRs by alternative cleavage  
317 and polyadenylation activates oncogenes in cancer cells. *Cell* 138, 673–684.  
318  
319 McEwen, T.J., Yao, Q., Yun, S., Lee, C.-Y., and Bennett, K.L. (2016). Small RNA in situ  
320 hybridization in *Caenorhabditis elegans*, combined with RNA-seq, identifies germline-  
321 enriched microRNAs. *Dev. Biol.* 418, 248–257.  
322  
323 Mello, C.C., Schubert, C., Draper, B., Zhang, W., Lobel, R., and Priess, J.R. (1996). The PIE-  
324 1 protein and germline specification in *C. elegans* embryos. *Nature* 382, 710–712.  
325  
326 Melo, J.A., and Ruvkun, G. (2012). Inactivation of conserved *C. elegans* genes engages  
327 pathogen- and xenobiotic-associated defenses. *Cell* 149, 452–466.  
328  
329 Merritt, C., Rasoloson, D., Ko, D., and Seydoux, G. (2008). 3' UTRs are the primary  
330 regulators of gene expression in the *C. elegans* germline. *Curr. Biol.* 18, 1476–1482.  
331  
332 Millonigg, S., Minasaki, R., Nusch, M., Novak, J., and Eckmann, C.R. (2014). GLD-4-  
333 mediated translational activation regulates the size of the proliferative germ cell pool in the



334 adult *C. elegans* germ line. *PLoS Genet.* 10, e1004647.  
335  
336 Mukherji, S., Ebert, M.S., Zheng, G.X.Y., Tsang, J.S., Sharp, P.A., and van Oudenaarden, A.  
337 (2011). MicroRNAs can generate thresholds in target gene expression. *Nat. Genet.* 43, 854–  
338 859.  
339  
340 Nousch, M., and Eckmann, C.R. (2013). Translational control in the *Caenorhabditis elegans*  
341 germ line. *Adv. Exp. Med. Biol.* 757, 205–247.  
342  
343 Nousch, M., Yeroslaviz, A., Habermann, B., and Eckmann, C.R. (2014). The cytoplasmic  
344 poly(A) polymerases GLD-2 and GLD-4 promote general gene expression via distinct  
345 mechanisms. *Nucleic Acids Res.* 42, 11622–11633.  
346  
347 Nousch, M., Minasaki, R., and Eckmann, C.R. (2017). Polyadenylation is the key aspect of  
348 GLD-2 function in *C. elegans*. *RNA* 23, 1180–1187.  
349  
350 Rybak-Wolf, A., Jens, M., Murakawa, Y., Herzog, M., Landthaler, M., and Rajewsky, N.  
351 (2014). A variety of dicer substrates in human and *C. elegans*. *Cell* 159, 1153–1167.  
352  
353 Sambrook, J., and Russell, D.W. (2006). Rapid Amplification of 3' cDNA Ends (3'-RACE).  
354 *CSH Protoc* 2006.  
355  
356 Sandberg, R., Neilson, J.R., Sarma, A., Sharp, P.A., and Burge, C.B. (2008). Proliferating  
357 cells express mRNAs with shortened 3' untranslated regions and fewer microRNA target  
358 sites. *Science* (80-. ). 320, 1643–1647.  
359  
360 Seydoux, G., and Dunn, M.A. (1997). Transcriptionally repressed germ cells lack a  
361 subpopulation of phosphorylated RNA polymerase II in early embryos of *Caenorhabditis*  
362 *elegans* and *Drosophila melanogaster*. *Development* 124, 2191–2201.  
363  
364 Seydoux, G., and Fire, A. (1994). Soma-germline asymmetry in the distributions of  
365 embryonic RNAs in *Caenorhabditis elegans*. *Development* 120, 2823–2834.  
366  
367 Seydoux, G., Mello, C.C., Pettitt, J., Wood, W.B., Priess, J.R., and Fire, A. (1996).  
368 Repression of gene expression in the embryonic germ lineage of *C. elegans*. *Nature* 382,  
369 713–716.  
370

371 Shepard, P.J., Choi, E.-A., Lu, J., Flanagan, L.A., Hertel, K.J., and Shi, Y. (2011). Complex  
372 and dynamic landscape of RNA polyadenylation revealed by PAS-Seq. *RNA* *17*, 761–772.  
373

374 Sood, P., Krek, A., Zavolan, M., Macino, G., and Rajewsky, N. (2006). Cell-type-specific  
375 signatures of microRNAs on target mRNA expression. *Proc. Natl. Acad. Sci. USA* *103*,  
376 2746–2751.  
377

378 Stoeckius, M., Grün, D., Kirchner, M., Ayoub, S., Torti, F., Piano, F., Herzog, M., Selbach,  
379 M., and Rajewsky, N. (2014). Global characterization of the oocyte-to-embryo transition in  
380 *Caenorhabditis elegans* uncovers a novel mRNA clearance mechanism. *EMBO J.* *33*, 1751–  
381 1766.  
382

383 Tenenhaus, C., Subramaniam, K., Dunn, M.A., and Seydoux, G. (2001). PIE-1 is a  
384 bifunctional protein that regulates maternal and zygotic gene expression in the embryonic  
385 germ line of *Caenorhabditis elegans*. *Genes Dev.* *15*, 1031–1040.  
386

387 Wang, X., Zhao, Y., Wong, K., Ehlers, P., Kohara, Y., Jones, S.J., Marra, M.A., Holt, R.A.,  
388 Moerman, D.G., and Hansen, D. (2009). Identification of genes expressed in the  
389 hermaphrodite germ line of *C. elegans* using SAGE. *BMC Genomics* *10*, 213.  
390

391 West, S.M., Mecnas, D., Gutwein, M., Aristizábal-Corrales, D., Piano, F., and Gunsalus,  
392 K.C. (2018). Developmental dynamics of gene expression and alternative polyadenylation in  
393 the *Caenorhabditis elegans* germline. *Genome Biol.* *19*, 8.  
394

395 Wolke, U., Jezuit, E.A., and Priess, J.R. (2007). Actin-dependent cytoplasmic streaming in *C.*  
396 *elegans* oogenesis. *Development* *134*, 2227–2236.  
397

398 (2009). Correction for Ji et al., Progressive lengthening of 3' untranslated regions of mRNAs  
399 by alternative polyadenylation during mouse embryonic development. *Proc. Natl. Acad. Sci.*  
400 *USA* *106*, 9535–9535.  
401  
402  
403  
404  
405  
406  
407

## 1 **METHODS**

### 2 **Strains**

3 All *C. elegans* strains were cultured by standard techniques (Brenner and Schedl, 2016).  
4 Worms were maintained at 16 °C on *E. coli* OP50-seeded nematode growth medium (NGM)  
5 plates. The following strains were used in this study: N2 Bristol wild type, *gld-2(q497) gld-*  
6 *1(q485)/hT2 [bli-4(e937) let-?(q782) qIs48] (I;III)* and *glp-1(ar202) III*.

### 8 **Embedding and cryo-sectioning**

9 Gonads of wild type and mutants were dissected according to Francis and Nayak (Schedl  
10 lab) with minor modifications. The gonad, still attached to the worm body, was transferred to  
11 a specimen mold (Tissue-Tek<sup>®</sup> cryomold<sup>®</sup>) filled with tissue freezing medium. This medium is  
12 very viscos, facilitating the stretching of the gonad and the separation from the worm body.  
13 Once the gonad was stretched, distal tip end and proximal end (at the end of oogenesis)  
14 were marked with AffiGel<sup>®</sup> blue beads (Bio-Rad). Following, the specimen mold was rapidly  
15 frozen at -80 °C for 1 min and subsequently fixed in the cryotome to cut the gonad into slices  
16 of desired resolution. Each slice of the gonad was collected in an individual LoBind  
17 Eppendorf<sup>®</sup> tube and immediately transferred to dry ice. RNA extraction of each slice was  
18 performed according Junker et al. (2014) with minor modifications. All experiments were  
19 performed in biological and technical triplicates for wild type and replicates for mutants for  
20 each gonad arm, *i.e.*, anterior and posterior gonad arm.

### 22 **mRNA library preparation**

23 Reverse transcription and *in vitro* transcription were performed with the Ambion<sup>™</sup>  
24 MessageAmp<sup>™</sup> II kit according to CEL-seq method (Hashimshony et al., 2012) and tomo-  
25 seq method (Junker et al., 2014), except that all purification steps were performed using  
26 Agencourt<sup>®</sup> AMPure<sup>®</sup> XP beads according to CEL-seq2 (Hashimshony et al., 2016). Library  
27 preparation was performed using the Illumina TruSeq<sup>®</sup> small RNA kit following the tomo-seq  
28 protocol (Junker et al., 2014). Unlike CEL-seq1/2 and tomo-seq, unanchored oligo(dT)  
29 barcodes used in this study were designed according to the Hamming [8,4] code allowing for  
30 barcode correction after sequencing (**Table S5**) (Bystrykh, 2012). For uncut samples and the  
31 first replicates of cut anterior and posterior gonad arm samples (N2\_mRNA\_A1 and  
32 N2\_mRNA\_P1), barcodes according to CEL-seq and tomo-seq (Hashimshony et al., 2012;  
33 Junker et al., 2014) were used. Libraries (with 30 % of PhiX spike-in DNA) were sequenced  
34 on the NextSeq 500 in a paired end mode.

35  
36  
37

### 38 **Small RNA library preparation**

39 Small RNA libraries were only performed for the wild type N2 strain. Library preparation was  
40 performed for each slice separately using the SMARTer smRNA-Seq kit for Illumina from  
41 Clontech® according to manufacturer's instruction. Small RNA libraries of each slice were  
42 pooled and sequenced on HiSeq 2500 with a TruSeq® 1 x 50 cycle kit as the Clontech® kit is  
43 compatible with Illumina® adapters and primers.

44

### 45 **Poly(A)+-selected library preparation**

46 For the poly(A)+-selected library, several gonads were dissected and pooled. Library  
47 preparation was performed with the Illumina TruSeq® stranded mRNA kit according to  
48 manufacturer's instruction. Paired end sequencing was performed on the NextSeq 500.

49

### 50 **Ribosomal RNA depleted total RNA library preparation**

51 For the ribosomal RNA depleted (ribodepleted) total RNA library several gonads were  
52 dissected and pooled. Ribosomal depletion was performed according to Adiconis *et al.*  
53 (2013). Library preparation was performed with Illumina TruSeq® stranded total RNA kit.  
54 Paired end sequencing was performed on the NextSeq 500.

55

### 56 **Data pre-processing**

57 Raw sequencing basecalls were demultiplexed and converted to FASTQ format using  
58 bcl2fastq v2.18.0.12 pooling reads across lanes (`--no-lane-splitting`). No adapter  
59 trimming was performed at this stage by not specifying adapter sequences in the sample  
60 sheet CSV file. To avoid masking of the short read 1 (barcode and UMI), the `--mask-`  
61 `short-adapter-reads=10` option was used. 3' reads (read 2) were annotated with their  
62 corresponding (corrected) barcode and UMI sequences (read 1) using custom scripts. Reads  
63 with identical barcode, UMI and sequence were collapsed and the unique reads were  
64 assigned to per-slice FASTQ files by barcode. Small RNA reads were subject to two rounds  
65 of 3' end trimming by flexbar v. 2.5: The first round to remove 3' adapters, the second to  
66 remove the poly(A)-tail added during the library preparation (using 10 A's as 'adapter  
67 sequence'). 3' nucleotides with low basecall quality scores were trimmed using flexbars `--`  
68 `pre-trim-phred=30` option and the 3 nucleotides 5' overhang introduced by the template-  
69 switching polymerase were trimmed using a custom awk script also discarding reads with a  
70 remaining length < 18 nts.

71

### 72 **Mapping of reads to the *C. elegans* genome**

73 RNA-seq reads were mapped to the ce11/WBcel235 genome assembly using STAR\_2.5.1b  
74 and an index with splice junction information from the Ensembl 82 transcriptome annotation.

75 Alignments were sorted using sambamba v0.4.7. Coverage tracks were generated using  
76 bedtools v2.23.0 via the `genomecov` command specifying the `-split` and `-bg` options for  
77 splice-aware BedGraph output and splitting by strand using the `-strand` parameter. The  
78 total number of mapped reads per sample/splice was determined using the `flagstat`  
79 command of samtools 0.1.19-96b5f2294a and converted to the corresponding `-scale`  
80 parameter for `bedtools genomecov` for reads-per-million-mapped (RPM) normalization.  
81 Coverage BedGraph files were converted to BigWig format using `bedGraphToBigWig` v 4.

82

### 83 **3' extension of transcript annotation**

84 The identification of downstream coverage peaks for 3' extension of the WS260  
85 transcriptome was performed using a custom R script: For each protein coding gene, the  
86 intergenic distance to the next downstream protein coding, ncRNA, lincRNA, pseudogene,  
87 rRNA or snoRNA gene (on the same strand) was calculated. Intergenic regions longer than  
88 10 kb were truncated and the RPM-scaled genome coverage per sample of those regions  
89 was extracted from the BigWig files generated before. The per-sample coverage vectors  
90 were averaged per genomic position and binarized into uncovered regions ( $< 5$  RPM mean  
91 coverage) and covered regions ( $\geq 5$  RPM mean coverage). Covered regions with a length  
92 of  $\geq 50$  nucleotides were considered as coverage peaks. Per downstream intergenic region,  
93 the downstream-most coverage peak was selected for the 3' extension of the corresponding  
94 upstream gene. Only downstream extensions with a length up to 3 kb were considered for  
95 downstream analyses. For each gene with a downstream extension, all annotated transcript  
96 isoforms extending to the 3' most genomic position of the corresponding gene were kept and  
97 got their 3' UTRs extended by until the 3' position of the respective downstream peak. Those  
98 3' extended transcripts were exported to a GTF file and merged with the WS260  
99 transcriptome annotation using custom awk scripts.

100

### 101 **Transcriptome pre-processing**

102 To enable the assignment of 3' end RNA-seq reads to transcript isoforms, the 3' extended  
103 WS260 transcriptome annotation was pre-processed using a series of custom R scripts: 3'  
104 A's were trimmed from all annotated transcripts as they would be indistinguishable from  
105 poly(A)-tails. The resulting transcripts were truncated to the 3' most 500 nucleotides.  
106 Transcript isoforms with the same genomic coordinates and internal structure were collapsed  
107 and enumerated by decreasing corresponding (max.) 3' UTR length.

108

### 109 **Isoform-specific transcript abundance estimation**

110 RNA-seq reads were assigned to transcripts using kallisto 0.43.1: For 3' reads, an index of  
111 the collapsed transcriptome annotation described above was used. For full-length coverage

112 reads (poly(A)+ and ribodepleted total RNA-seq libraries), an index of the full 3' extended  
113 transcriptome annotation was used. For all libraries, the `--bias` was passed to `kallisto`  
114 `quant`. For single end reads, additionally the `--single`, `--fragment-length=1` and `--`  
115 `sd=1` options were used. All libraries were sequenced with a first-strand-reverse stranded  
116 protocol. Thus, poly(A)+ and ribodepleted total RNA-seq samples were analyzed in `--rf-`  
117 `stranded` mode. The 3' reads, while presented to `kallisto` as single-end reads, originally  
118 were sequenced as read 2, therefore resembling first-strand-forward single-end data. Thus,  
119 for these libraries the `--fr-stranded` mode of `kallisto quant` was used. Per-isoform  
120 read counts were exported to TSV files using the `--plaintext` option.

121

## 122 **Data processing**

123 The raw read counts per transcript isoform and slice/sample were further processed using a  
124 custom R script: Though the whole annotated transcriptome was quantified to check for  
125 specificity of the experimental and computational approach, downstream analyses were  
126 limited to protein coding transcripts only. For gene-level analyses, isoform-level read counts  
127 were summed across all isoforms of a given gene. To compensate for differences in  
128 sequencing depth, raw read counts were normalized to counts-per-million (CPM). For full-  
129 length coverage protocols (poly(A)+ and ribodepleted total RNA-seq) an additional correction  
130 for the transcript length was performed, resulting in transcripts-per-million (TPM) estimates.  
131 Slice-data were arranged from distal to proximal by the known order of their barcodes and  
132 assigned to a relative position scale representing each slice by its center and accounting for  
133 differences in the number of slices per sample.

134

## 135 **Aligning cryo-cuts of different samples to a single coordinate system**

136 As the start- and endpoint of gonad slicing was not precisely the same for all replicates, all  
137 slices of different replicates were aligned to a common coordinate system. This was  
138 achieved by comparing per-sample LOESS fits of abundance estimates across slices with *in*  
139 *situ* images of certain genes in the germline. Therefore, the gene profile of one replicate was  
140 fixed according to the corresponding *in situ* image and other replicates were aligned to the  
141 fixed replicate. This was done for approx. 30 gene profiles and the median of the shifting for  
142 those 30 profiles was calculated and used for all gene profiles.

143

## 144 **Integration of replicate data**

145 The aligned discrete per-gene/isoform spatial expression profiles of individual replicates were  
146 used to fit a continuous consensus profile using local regression (LOESS) with a span of 0.4  
147 through a custom R script. Slices with less than 10000 reads assigned to the transcriptome  
148 ('dropout-slices') were excluded from the fitting procedure. For visualization, 50 equidistant



149 points along the distal-to-proximal axis were inferred from those fits. For downstream  
150 analyses, only 20 points were used to reflect the actual resolution of the data more  
151 conservatively. All data (incl. dropout-slices) are available through the interactive data  
152 exploration interface published alongside this study.

153

### 154 **Physical gonad model**

155 To be able to assign the relative distal-to-proximal coordinates used for the spatially resolved  
156 gene expression profiles, a physical model of the *C. elegans* germline was built using a  
157 custom R script. The following assumptions were made for that model: i) Cells are  
158 approximately spherical. ii) Germ cells form a single layer tube within the distal part of the  
159 gonad arm. iii) The diameter of the gonad is minimal under the constraint of encompassing  
160 all germ cells. This enables a direct conversion between the number of cells in a germ cell  
161 layer and the diameter of that cell layer (given the size of a single germ cell) using basic  
162 geometry:

163

$$164 \quad \phi_G(d_L(l)) := \frac{\phi_g}{2 \sin\left(\frac{\pi}{N_{g_L}(l)}\right)} \cdot 2 + \phi_g = \left(1 + \left[\sin\left(\frac{\pi}{N_{g_L}(l)}\right)\right]^{-1}\right) \phi_g$$

165

166 were  $\phi_g$  is the diameter of a germ cell,  $l \in \{1,10\} \subset \mathbb{N}$  is the germ cell layer (one-based),  
167  $N_{g_L}(l)$  is the number of germ cells in layer  $l$ ,  $d_L(l)$  is the distance of the center of layer  $l$  to  
168 the distal tip cell (DTC) ( $d_L(l) := \left(l - \frac{1}{2}\right) \phi_g$ ) and  $\phi_G(d)$  is the diameter of the gonad arm at  
169 distance  $d$  from the DTC.

170 The (modelled constant) diameter of a single germ cell was set to 4.6  $\mu\text{m}$  (Maciejowski et al.,  
171 2006). Based on our own measurements and results by Hirsh and colleagues (Hirsh et al.,  
172 1976) the total length of a stretched-out gonad arm was defined as 650  $\mu\text{m}$ . At this distance  
173 to the distal tip cell (DTC) (*i.e.*, at the proximal end), the gonad must fit a fully mature oocyte,  
174 while at the distal-most end only a single germ cell needs to be fit in the gonad arm. To get a  
175 rough estimate of the size of a fully matured oocyte, the number of cells per embryo (558)  
176 (Wolke et al., 2007) was multiplied with the volume of a single germ cell. Given the equality  
177 in diameter of embryonic cells and germ cells and the equality in volume of the mature  
178 oocyte and the embryo, this gives a direct estimate for the size of the oocyte. To be able to  
179 model the gonad diameter in-between those extreme boundaries, we measured four gonad  
180 arms based on microscopic images (Table S1). Using these measurements at discrete  
181 points, a spline fit was used to model the radius of the gonad arm as a function of the  
182 distance to the DTC. Using this fit, the outline of the stretched-out gonad arm was modeled  
183 as a solid of revolution around the distal-to-proximal axis:



184

$$185 \quad v_G(d_s, d_e) = \pi \int_{d_s}^{d_e} r_G(d)^2 dd$$

186

187 where  $d_s$  and  $d_e$  denote the distance to the DTC of the start and the end of the interval of  
 188 interest, respectively, and  $v_G(d_s, d_e)$  is the volume of the corresponding part of the gonad  
 189 arm.

190 Based on the assumptions introduced above, the distal arm was filled with 1,002 germ cells  
 191 in layers maximizing the number of cells per layer under the constraint given by the  
 192 corresponding gonad diameter:

193

$$194 \quad n_{g_L}(l) := \begin{cases} 0 & \text{if } \phi_L(l) < \phi_g \\ 1 & \text{if } \phi_L(l) < 2\phi_g \\ \left\lfloor \frac{\pi}{\arcsin\left(\frac{\phi_g}{\phi_L(l) - \phi_g}\right)} \right\rfloor & \text{otherwise} \end{cases}$$

195

196 where  $l \in \left\{1, \left\lfloor \frac{d_B}{w_L} \right\rfloor\right\} \subset \mathbb{N}$  ( $d_B$  representing the distance to the DTC of the bend and  $w_L := \phi_g$   
 197 the width of a germ cell layer) is the germ cell layer of interest (one-based),  $n_{g_L}(l)$  is the  
 198 number of germ cells in that layer, and  $\phi_L(l)$  is the minimal diameter of the gonad in the  
 199 interval containing germ cell layer  $l$ :

200

$$201 \quad \phi_L(l) := \phi_{G_L}(l) = \min_{d \in [(l-1)w_L, lw_L] \subset \mathbb{R}} 2r_G(d)$$

202

203 where  $r_G(d)$  is the radius of the gonad at distance  $d$  from the DTC according to the spline  
 204 model.

205 The total number of distal germ cells was derived from the total number of distal germ cell  
 206 layers which was determined by comparing the cumulative number of cells up to each  
 207 potential layer to the expected number of germ cells  $\tilde{N}_g := 1000$ :

208

$$209 \quad N_g := n_{g_L}^{\Sigma}(N_L)$$

210

211 with

212

213 
$$n_{g_L}^{\Sigma}(l) := \sum_{\lambda=1}^l n_{g_L}(\lambda)$$

214 and

215

216 
$$N_L := \arg \min_{l=1}^{\lfloor \frac{d_B}{w_L} \rfloor} |\tilde{N}_g - n_{g_L}^{\Sigma}(l)|$$

217

218 The mean distance in-between cells within the same layer resulting from this model was  
219 used as distance in-between germ-cell layers:

220

221 
$$w_L := \phi_g + \bar{d}_g$$

222

223 with

224

225 
$$\bar{d}_g := \sum_{\lambda=1}^{\lfloor \frac{d_B}{w_L} \rfloor} \frac{d_{g_L}(\lambda)}{\lfloor \frac{d_B}{w_L} \rfloor}$$

226

227 where

228

229 
$$d_{g_L}(l) := \frac{\phi_L(l)}{1 + \frac{1}{\sin\left(\frac{\pi}{N_g}\right)}} - \phi_g$$

230

231 Germ layers were annotated functionally based on literature (Brenner and Schedl, 2016; Fox  
232 et al., 2011). The proximal gonad arm was filled with 8 oocytes, maximizing the diameter of  
233 each oocyte under the constraint of the corresponding gonad diameter. The proximal end of  
234 the distal germ cell layers and the distal end of the distal-most oocyte defined the boundaries  
235 of the loop region. Assuming steady-state with an apoptotic rate of 90% (Brenner and  
236 Schedl, 2016), the loop region was filled with 100 germ cells in layers (uniformly spread  
237 across the loop region).

238

### 239 **Data analysis of the small RNA transcriptome**

240 The trimmed libraries were first mapped with bowtie2 (version 2.3.3.1) using the parameters -  
241 -very-fast-local --phred33 --local to the *E. coli* genome (NC\_000913.3, K-12,

242 MG1655) in order to remove *E. coli* RNA contamination. The cleaned-up libraries were then  
243 mapped with STAR (version 2.5.3a) to the WBcel235/ce11 genome assembly using the  
244 Ensembl 87 annotation and the parameters

```
245 -alignIntronMax 140000 -alignSJDBoverhangMin 17  
246 --alignSplicedMateMapLmin 30 --outFilterMultimapNmax 5  
247 --outFilterMismatchNmax 2 --outFilterMatchNmin 17  
248 --outFilterScoreMinOverLread 0 --outFilterMatchNminOverLread 0.
```

249 Sense and antisense read counting on features was done using HTSeq (version 0.9.1) with  
250 the parameters `-a 0 -m intersection-nonempty --nonunique=all`

```
251 --secondary-alignments=score
```

 combined with `-s yes` for sense and with  
252 `-s reverse` for antisense counts. Known and novel miRNAs were identified separately  
253 using the cleaned-up libraries and the miRDeep2 algorithm (version 2.0.0.7) with the  
254 miRBase21 reference. First, miRDeep2 was ran on the pooled libraries. Then, the novel  
255 miRNA predictions found were added to the miRBase21 reference. Consequently, the  
256 combined reference of known and novel miRNAs was used for a second run of miRDeep2 on  
257 each library separately and on the pooled library as well. This way we unified the expression  
258 estimates of known and novel miRNAs under a common measure of counts per million of  
259 mapped reads (CPM).

260 The miRNA-target correlation analysis used robust linear regression based on the MM-  
261 estimator in order to reduce the effect of outliers (Koller and Stahel, 2011). All miRNAs were  
262 divided into families based on their 2 - 7nt 6mer seeds (reverse-complemented). Putative  
263 target genes were identified by counting miRNA 7mer seeds on all of their unique and  
264 longest 3' UTR isoforms. The 3' UTR isoform with the maximum number of 7mer seeds was  
265 taken as representative for that miRNA-target gene interaction. The miRNA 7mer seeds were  
266 chosen to be either the reverse-complement of the miRNA 2 - 8nts or the reverse-  
267 complement of the miRNA 2 - 7nts immediately followed by an A (Bartel, 2009). The control  
268 list of targets was generated by mutating the 3<sup>rd</sup> and 4<sup>th</sup> nucleotides of these 7mer seeds.  
269 Robust linear regression was done by summing the LOESS smoothed CPMs among the  
270 miRNA family members on each LOESS point and using this summarized family-wise  
271 expression with the corresponding target smoothed expression. In order for a correlation to  
272 be considered we demanded that both the family-wise miRNA expression and the target  
273 expression were commonly non-zero in at least 25% of the LOESS points.

274

### 275 **Probe preparation for mRNA in situ hybridization (ISH)**

276 Digoxigenin (DIG)-labeled anti-sense RNA probes were prepared by *in vitro* transcription  
277 using a PCR generated DNA template. PCR primers were designed using Primer3 to amplify  
278 a 300-500 nt fragment from the cDNA prepared from whole worm samples. The T7 promoter

279 sequence was added to the reverse primer to produce later an antisense probe by *in vitro*  
280 transcription. Primer sequences are provided in **Table S4**. PCR fragments were cleaned-up  
281 using Agencourt® AMPure® XP beads and *in vitro* transcription was performed with 0.5 - 1 µg  
282 DNA template using the T7 RNA polymerase and a DIG-RNA labeling mix (Invitrogen).  
283 Remaining DNA template was digested with DNase I and the RNA probe was precipitated  
284 with sodium acetate and ethanol for at least 30 min at -80 °C. After centrifugation the RNA  
285 pellet was washed with 75 % ethanol and probe integrity was checked on an agarose gel.  
286 The concentration of each RNA probe was adjusted to 50 ng/µl using 10 mM Tris-  
287 HCl/formamide solution (1:1).

288

### 289 **mRNA ISH**

290 Worms were washed several times in sperm salt buffer only (100 mM PIPES, pH 7.0; 90 mM  
291 NaCl; 50 mM KCl; 40 mM CaCl<sub>2</sub>; 20 mM KH<sub>2</sub>PO<sub>4</sub>) and in the final step in sperm salt buffer  
292 containing levamisole. Up to 15 worms were transferred to a poly-L-lysine coated slide  
293 containing 8 µl of sperm salt and gonads were dissected according Francis and Nayak  
294 (Schedl lab) with minor modifications. After dissection 8 µl of 4 % paraformaldehyde (PFA)  
295 were added to the dissected gonads, a cover slip was put on top and the slide was incubated  
296 for 2 min. Following, the slide was incubated on dry ice for at least 20 min and the coverslip  
297 was flipped away using a razor blade under the coverslip (freeze and crack method). Slides  
298 were immediately immersed in ice-cold 100 % ethanol for 2 min, rehydrated in an ethanol  
299 series (90 %, 70 %, 50 %, 20%), following washing with PBS containing 0.2 % Tween for 30  
300 min. Permeabilization of gonads was achieved with proteinase K treatment (1 µg/ml) for 5  
301 min. Slides were washed in PBS containing 0.1 % Tween (PBS-T), fixed for 20 min in 4 %  
302 PFA, washed again with PBS-T, incubated in TEA buffer (aqua dest. containing 1.3 %  
303 triethanolamine; always prepared fresh), following final washing steps in PBS-T. Slides were  
304 prehybridized in prehybridization buffer (10 mM HEPES, pH 7.5; 600 mM NaCl; 50 mM DTT;  
305 1 mM EDTA; 1 x Denhardt's solution; 100 µg/ml tRNA; 50 % formamide) for 1 h at 50 °C.  
306 Slides were hybridized over night at 50 °C in hybridization buffer (prehybridization buffer  
307 containing 10 % dextran sulphate) containing 0.5 - 1 µg/ml denaturated DIG-labeled  
308 antisense RNA probe (denaturation at 95 °C for 10 min). Slides were washed at 50 °C for 10  
309 min with following solutions: posthybridization buffer (posthyb, 1 x 50 % formamide in 5 x  
310 SSC); 75 % posthyb buffer + 25 % 2 x SSC, 0.1 % Triton X; 50 % posthyb buffer + 50 % 2 x  
311 SSC, 0.1 % Triton X; 25 % posthyb buffer + 75 % 2 x SSC, 0.1 % Triton X; 2 x SSC, 0.1 %  
312 Triton X; 0.22 x SSC, 0.1 % Triton X. Following, slides were washed in maleic acid buffer  
313 (11.6 g/l maleic acid; 9.76 g/l NaCl; 0.1 % Triton X; pH 7.5) and afterwards incubated in 1 %  
314 blocking solution (Roche) diluted in maleic acid buffer for 1 h. Slides were incubated in Anti-  
315 DIG-AP (Roche, 1:2500) over night at 4 °C. After several washes with maleic acid buffer and

316 TMN buffer (0.1 M Tris-HCl, pH 9.5; 0.1 M NaCl; 50 mM MgCl<sub>2</sub>; 1 % Tween 20; always  
317 prepared fresh), the signal was developed using NBT/BCIP (diluted in TMN buffer) solution.  
318 Time of development depended on the expression of the corresponding RNA and took up to  
319 24 h for very lowly expressed RNAs. The background was removed with dehydration and  
320 rehydration in an ethanol series (samples were fixed before in 4 % PFA for 20 min again).  
321 For mounting, some  $\mu$ l of prolong gold (Invitrogen) were dropped on a coverslip and then  
322 inverted onto the slide. The edges were sealed with a nail polish.

323

#### 324 **small RNA ISH**

325 Gonad preparation and the prehybridization procedure was the same as for mRNA ISH. The  
326 TEA buffer contained additionally 0.06 N HCl and 0.27 % acetic anhydride. For small RNA  
327 ISH, DIG-labeled LNA (Locked Nucleic Acid) probes (former: Exiqon, now: Qiagen) were  
328 used (**Table S4**) and the prehybridization and hybridization temperature was set according to  
329 manufacturer's instruction (20 - 25 °C below the melting temperature of the LNA probe). LNA  
330 probes were denaturated at 95 °C for 1 - 5 min prior hybridization. Prehybridization (without  
331 probe) was done for 1 h and hybridization (with 10 - 25 nM of LNA probe) over night. Slides  
332 were washed several times with 2 x SSC buffer and with 0.2 x SSC buffer. Following, the  
333 slides were washed with PBS-T and incubated for 1 h in blocking solution (PBS-T containing  
334 5 % normal goat serum). Slides were incubated in Anti-DIG-AP (Roche, 1:2000) over night at  
335 4 °C. After several washes with PBS-T and TMN buffer signal developing, background  
336 removal and mounting was performed according to mRNA ISH.

337

#### 338 **TaqMan<sup>®</sup> assays**

339 The TaqMan<sup>®</sup> assay was used to validate some of the novel miRNA predictions. TaqMan<sup>®</sup>  
340 probes were designed with the Custom TaqMan<sup>®</sup> Small RNA Assay Design Tool  
341 (ThermoFisher). TaqMan<sup>®</sup> assays were performed according manufacturer's instruction for  
342 gonad and whole worm samples. TaqMan<sup>®</sup> target sequences are provided in **Table S4**.

343

#### 344 **Nested PCR**

345 Nested PCR was performed according to the Cold Spring Harbor Protocols (Sambrook and  
346 Russell, 2006). 0.5 - 1  $\mu$ g of whole worm and gonad RNA were used as input RNA for the  
347 cDNA synthesis using TAP-VN as a primer. For the first nested PCR, 4  $\mu$ l of 1:5 diluted  
348 cDNA was used. The first PCR was performed with a gene-specific forward primer and AP  
349 as a reverse primer. PCR products were purified using Agencourt<sup>®</sup> AMPure<sup>®</sup> XP beads and  
350 10 - 20 ng of purified PCR were used for the second nested PCR. The second PCR was  
351 performed with a second gene-specific primer and MAP as a reverse primer. Annealing  
352 temperature was calculated using the NEB Tm Calculator (BioLabs). The PCR products from

353 the second PCR were separated by agarose gel, purified and Sanger-sequenced to confirm  
354 the identity of the bands. Nested PCR was used for 3' UTR extension validation.  
355 Alternatively, conventional PCR by designing the forward primer in the second last exon (to  
356 distinguish from genomic DNA) and the reverse primer in the 3' UTR extension was used for  
357 validation (using whole worm RNA only). Primer sequences are provided in **Table S4**.



# 1 SUPPLEMENTARY FIGURES

2

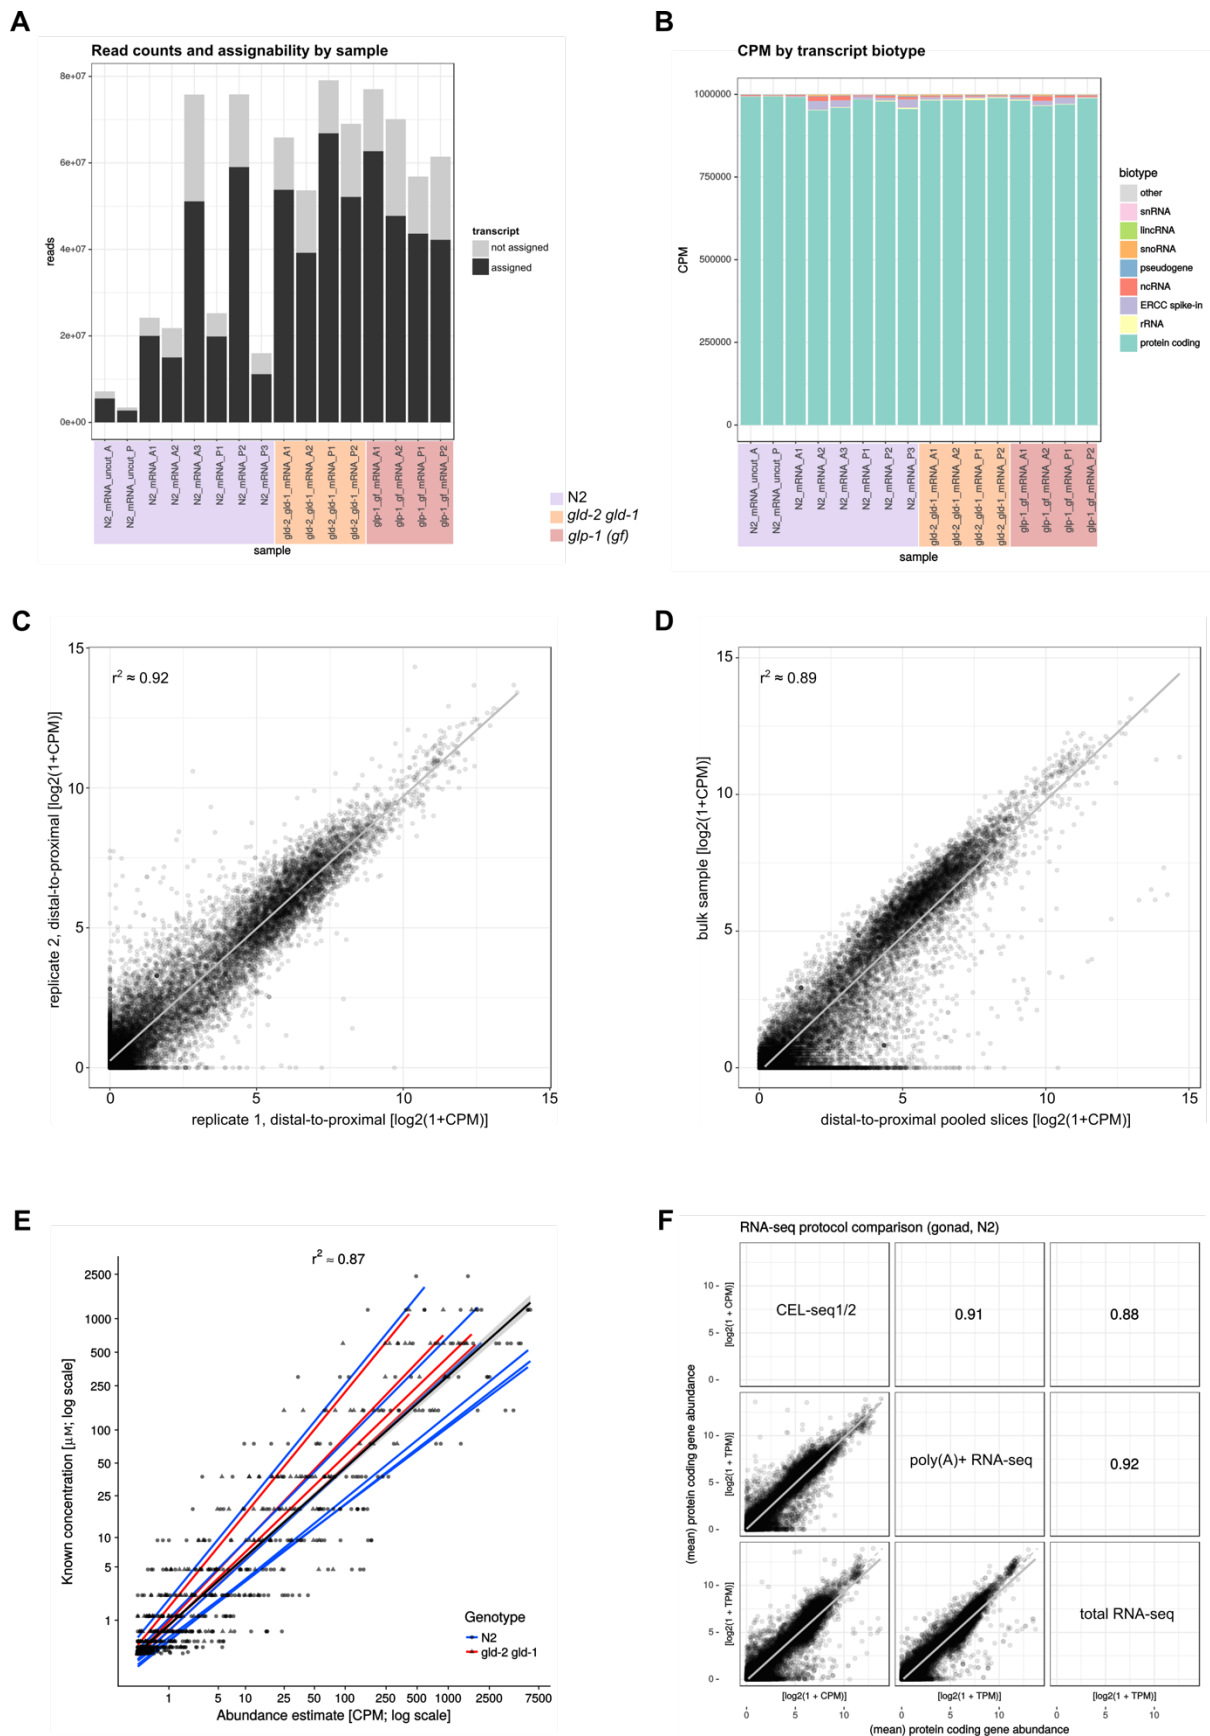

3

4

5 **Figure S1. Experimental approach for spatial gene expression is reproducible and reliable. Related to**  
6 **Figure 1.**

7 (A) Read counts and assignability of reads for each biological and technical replicate of N2, *gld-2 gld-1* double  
8 mutant and *glp-1 (gf)* mutant.

9 (B) Transcript biotype distribution over the fraction of mapped reads for each biological and technical replicate of  
10 N2, *gld-2 gld-1* double mutant and *glp-1 (gf)* mutant.

11 (C) Linear correlation (Pearson's  $r$ ) across all transcripts, summed and averaged over all sections for two  
12 biological replicates.

13 (D) Linear correlation (Pearson's  $r$ ) across all transcripts of uncut (bulk) sample and sliced samples (summed and  
14 averaged over all sections for all biological replicates).

15 (E) Linear correlation (Pearson's  $r$ ) of known ERCC spike-in concentration and estimated spike-in abundance for  
16 N2 (red line) and *gld-2 gld-1* double mutant (blue line).

17 (F) Linear correlation (Pearson's  $r$ ) across all genes for different sequencing approaches, *i.e.*, CEL-seq1/2,  
18 poly(A)+ RNA-seq and total RNA-seq.

19  
20  
21  
22  
23  
24  
25  
26  
27  
28  
29  
30  
31  
32  
33  
34  
35  
36  
37  
38  
39  
40  
41  
42  
43  
44

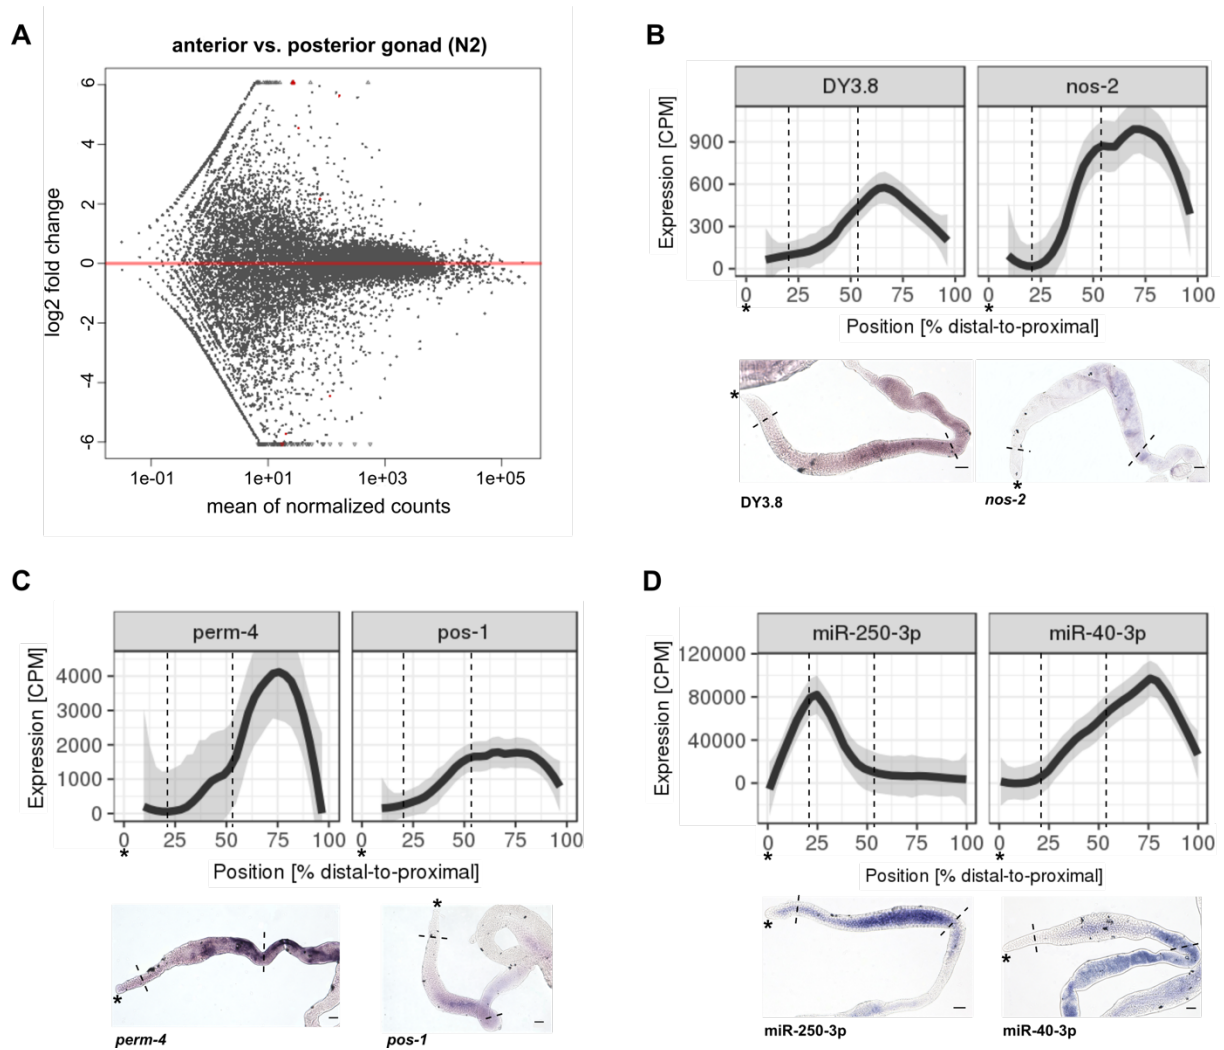

**Figure S2. mRNAs and miRNAs are localized in the germline. Related to Figure 1.**

(A) Comparison of all N2 samples on the gene level by gonad arm (anterior or posterior) using DESeq2.

(B) Spatial expression of *DY3.8* and *nos-2* from distal to proximal.  $n=6$  independent experiments, LOESS  $\pm$  standard error (SE). Corresponding *in situ* hybridization (ISH) images of *DY3.8* and *nos-2*. Asterisk: Distal tip cell (DTC). Scale bar: 20  $\mu$ m. Dashed lines represent the different zones in the germline.

(C) Spatial expression of *perm-4* and *pos-1* from distal to proximal.  $n=6$  independent experiments, LOESS  $\pm$  SE. Corresponding ISH images of *perm-4* and *pos-1*. Asterisk: DTC. Scale bar: 20  $\mu$ m. Dashed lines represent the different zones in the germline.

(D) Spatial expression of miR-250-3p and miR-40-3p from distal-to-proximal.  $n=6$  independent experiments, LOESS  $\pm$  SE. Corresponding ISH images of miR-250-3p and miR-40-3p. Asterisk: DTC. Scale bar: 20  $\mu$ m. Dashed lines represent the different zones in the germline.

45  
46  
47  
48  
49  
50  
51  
52  
53  
54  
55  
56  
57  
58  
59  
60  
61  
62  
63  
64

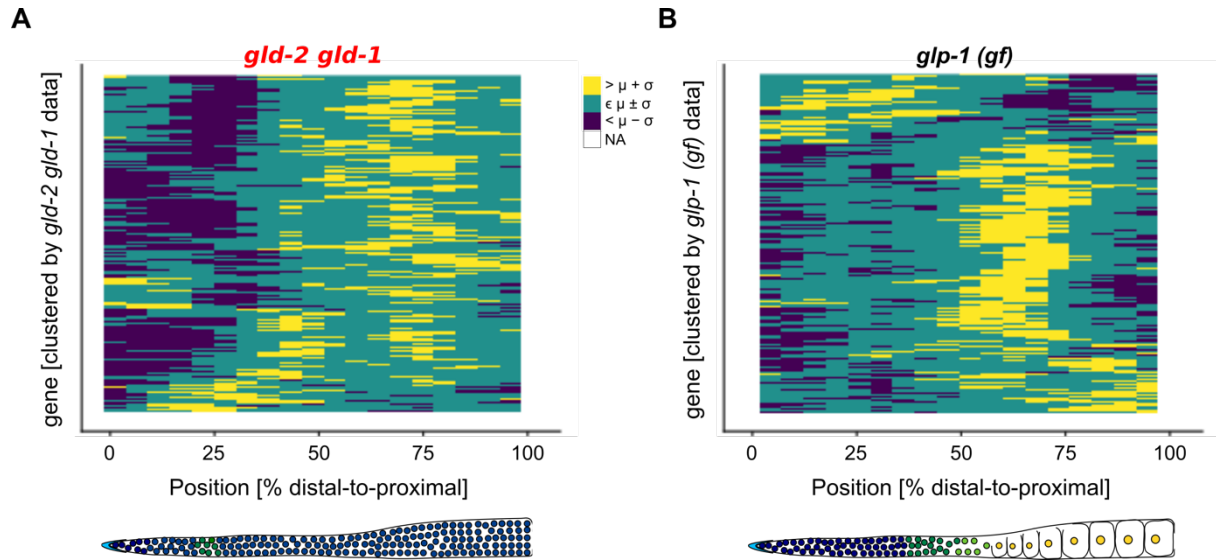

65

66

67 **Figure S3. *gld-2 gld-1* double mutant and *glp-1 (gf)* mutant display mRNA localization. Related to Figure 3.**

68 (A) Hierarchical clustering of germline specific genes by linear correlation ( $1 - \text{Pearson's } r$ ) for *gld-2 gld-1* double  
69 mutant.  $\mu$ : Mean.  $\sigma$ : Standard deviation. NA: No data.

70 (B) Hierarchical clustering of germline specific genes by linear correlation ( $1 - \text{Pearson's } r$ ) for *glp-1 (gf)* mutant.

71  $\mu$ : Mean.  $\sigma$ : Standard deviation. NA: no data.

72

73

74

75

76

77

78

79

80

81

82

83

84

85

86

87

88

89

90

91

92

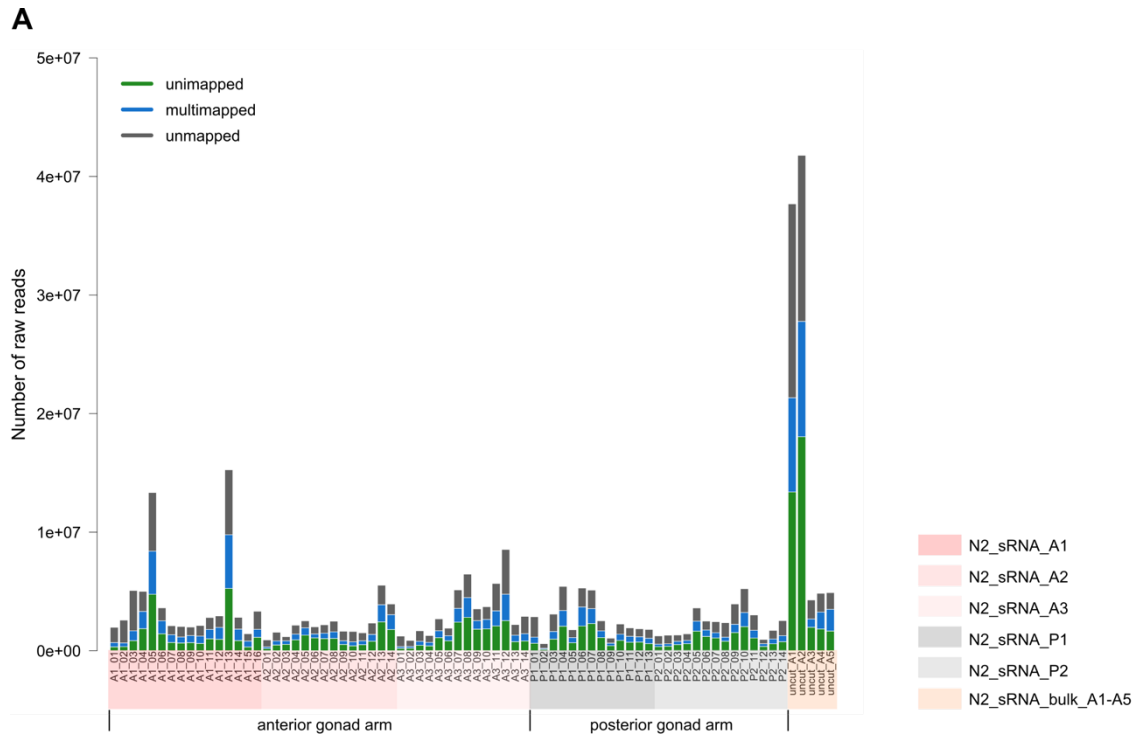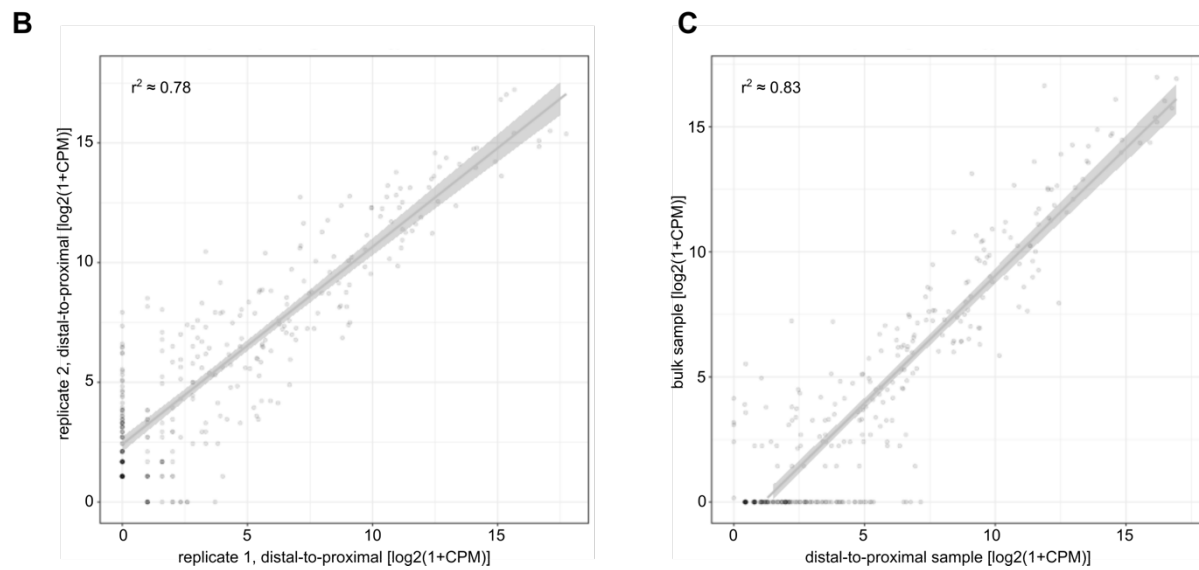

93

94

95 **Figure S4. Experimental approach for spatial miRNA expression is highly reproducible and reliable.**

96 **Related to Figure 1 and 4.**

97 (A) Read counts and assignability of reads for each biological and technical replicate.

98 (B) Linear correlation (Pearson's  $r$ ) across all miRNAs of *in silico* pooled slices for two biological replicates.

99 (C) Linear correlation (Pearson's  $r$ ) across all miRNAs of uncut (bulk) sample and *in silico* pooled slices.

100

101

102

103

104

105

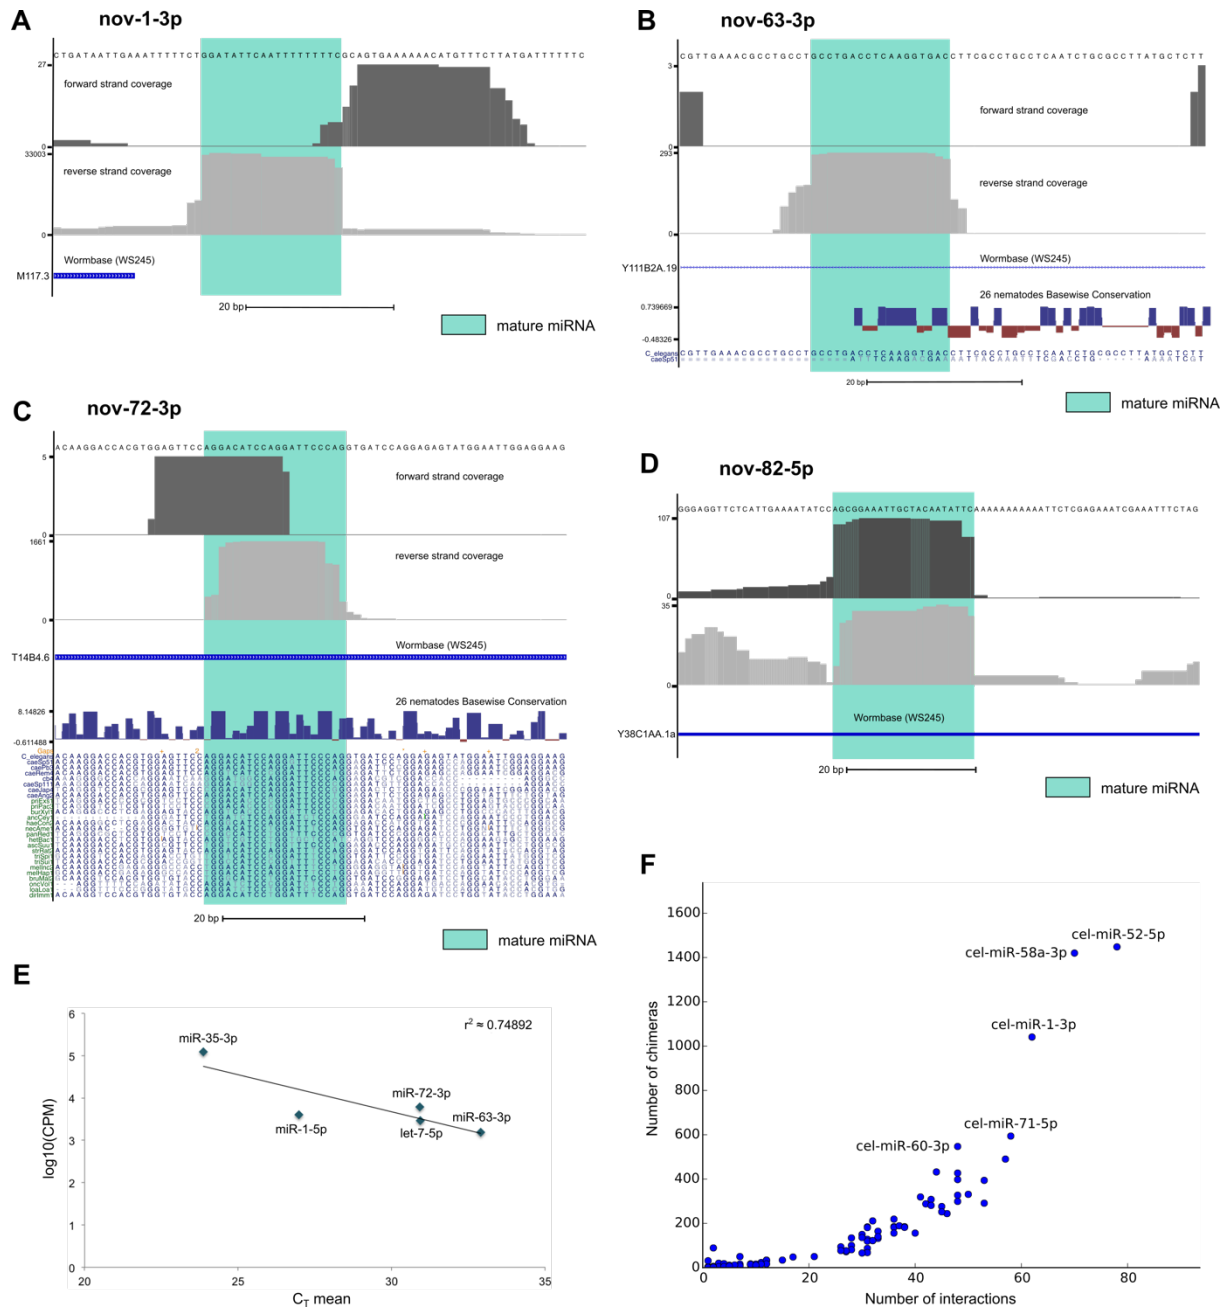

106

107

108 **Figure S5. Novel miRNA predictions exhibit miRNA-like features. Related to Figure 4.**

109 (A) Genome browser track showing read coverage of predicted miRNA candidate, nov-1-3p with reads stacking  
 110 up mostly on the mature sequence (light blue) at aligned 5' positions. Forward strand coverage is indicated in  
 111 dark grey and reverse strand coverage is indicated in light grey.

112 (B) Genome browser track showing read coverage of predicted novel miRNA candidate, nov-64 with reads  
 113 stacking up mostly on the mature sequence (light blue) at aligned 5' positions. Forward strand coverage is  
 114 indicated in dark grey and reverse strand coverage is indicated in light grey. Conservation across different  
 115 species is displayed at nucleotide resolution.

116 (C) Genome browser track showing read coverage of predicted novel miRNA candidate, nov-72-3p with reads  
 117 stacking up mostly on the mature sequence (light blue) at aligned 5' positions. Forward strand coverage is  
 118 indicated in dark grey and reverse strand coverage is indicated in light grey. Conservation across different  
 119 species is displayed at nucleotide resolution.



120 (D) Genome browser track showing read coverage of predicted novel miRNA candidate, nov-82-5p with reads  
121 stacking up mostly on the mature sequence (light blue) at aligned 5' positions. Forward strand coverage is  
122 indicated in dark grey and reverse strand coverage is indicated in light grey.

123 (E) Correlation of expression (CPM) of known miRNAs (mir-35-3p, mir-1-3p and let-7-5p) and novel miRNA  
124 predictions (nov-63-3p and nov-72-3p) with corresponding  $C_T$  values measured by TaqMan<sup>®</sup> assay (expression of  
125 mature miRNAs).

126 (F) Number of miRNA:mRNA chimeras for the novel miRNA nov-72-3p.

127

128

129

130

131

132

133

134

135

136

137

138

139

140

141

142

143

144

145

146

147

148

149

150

151

152

153

154

155

156

157

158

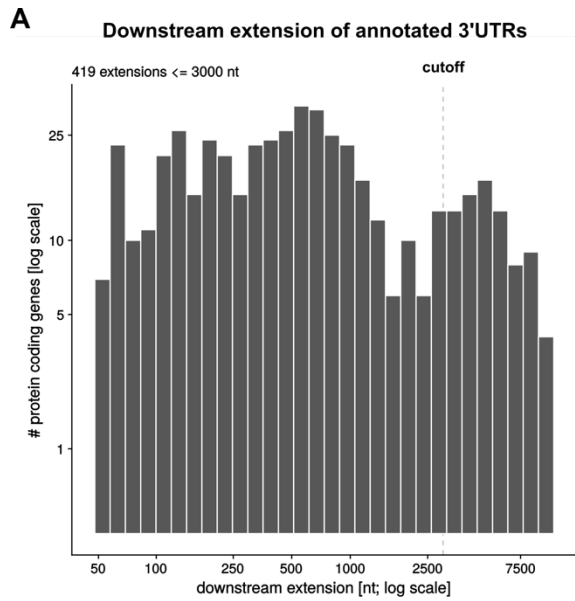

**B**

| Gene            | 3'UTR length (WS260) [bp] | 3'UTR extension (our data) [bp] | Validation successful |
|-----------------|---------------------------|---------------------------------|-----------------------|
| C49F5.3         | no 3'UTR                  | 65                              | yes                   |
| <i>uba-2</i>    | 731                       | 238                             | yes                   |
| <i>rec-8</i>    | 371                       | 282                             | yes                   |
| <i>ztf-20</i>   | 232                       | 608                             | yes                   |
| <i>par-4</i>    | 463                       | 704                             | no                    |
| <i>exos-4.2</i> | 160                       | 877                             | yes                   |
| <i>nhl-2</i>    | 508                       | 976                             | yes                   |
| <i>spin-4</i>   | 142                       | 1823                            | no                    |
| Y92H12BR.7      | 33                        | 2359                            | yes                   |
| W05F2.7         | 100                       | 2712                            | no                    |

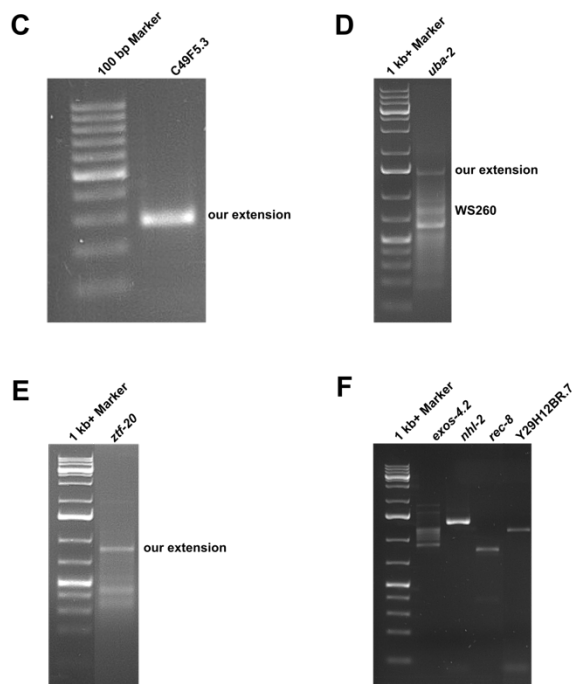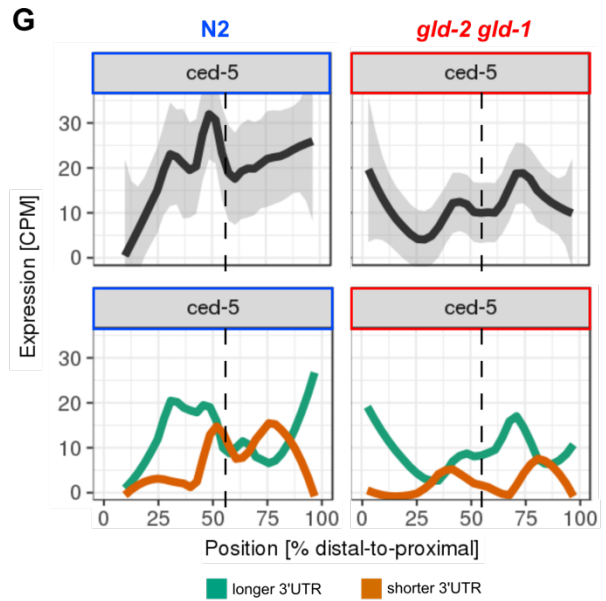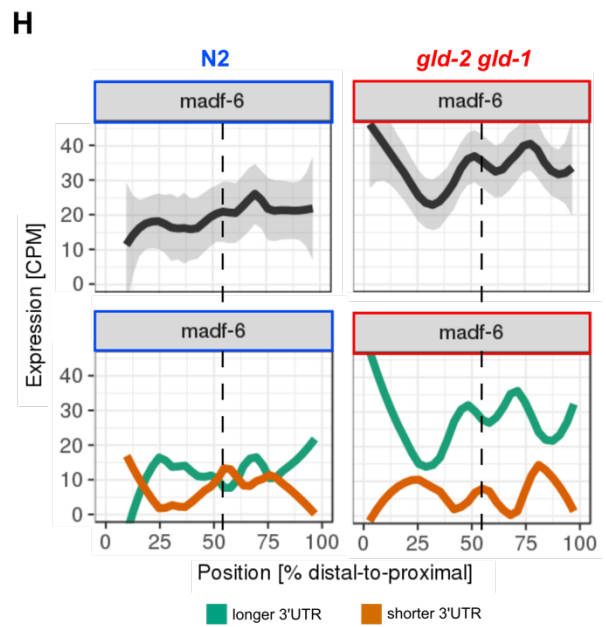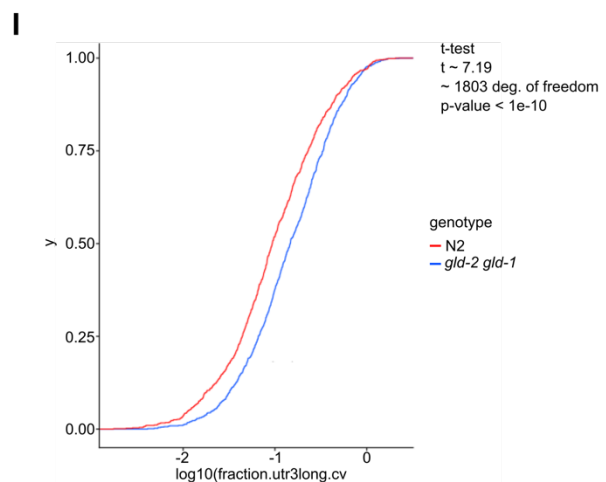

159  
160  
161

162 **Figure S6. Downstream extension and validation of annotated 3' UTRs and examples of differential 3' UTR**  
163 **isoform usage across germline. Related to Figure 6.**

164 (A) Summary of all downstream extensions of annotated 3' UTRs. Only candidates with an extension smaller or  
165 equal to 3000 nt were considered for further analysis and validation.

166 (B) Table summarizing candidates that were chosen for downstream extension validation with annotated 3' UTR  
167 length (WS260), downstream extension and result of validation.

168 (C) Validation of downstream extension of C49F5.3 annotated 3' UTR by nested PCR. Marker: 1 kb+ gene ruler.

169 (D) Validation of downstream extension of *uba-2* annotated 3' UTR by nested PCR. Marker: 1 kb+ gene ruler. Our  
170 extension and WS260 annotation are indicated.

171 (E) Validation of downstream extension of *ztf-20* annotated 3' UTR by nested PCR. Marker: 1 kb+ gene ruler.

172 (F) Validation of downstream extension of *exos-4.2*, *nhl-2*, *rec-8* and Y29H12BR.7 annotated 3' UTR by  
173 conventional PCR. Marker: 1 kb+ gene ruler.

174 (G) Spatial expression of *ced-5* in wild type N2 and *gld-2 gld-1* double mutant from distal-to-proximal at gene and  
175 isoform level. n=6 independent experiments for N2 and n=4 for *gld-2 gld-1*, LOESS  $\pm$  standard error (SE) for gene  
176 level and LOESS only for isoform level. Longest 3' UTR is marked in turquoise and shorter 3' UTR in orange.  
177 Dashed line marks the bend/loop region of the germline.

178 (H) Spatial expression of *madf-6* in wild type N2 and *gld-2 gld-1* double mutant from distal-to-proximal at gene  
179 and isoform level. n=6 independent experiments for N2 and n=4 for *gld-2 gld-1*, LOESS  $\pm$  SE for gene level and  
180 LOESS only for isoform level. Longest 3' UTR is marked in turquoise and shorter 3' UTR in orange. Dashed line  
181 marks the bend/loop region of the germline.

182 (I) Comparison of the cumulative densities of 3' UTR variability distribution between N2 and *gld-2 gld-1* double  
183 mutant. 3' UTR variability was measured by the coefficients of variation (CV) of the contribution of longer 3' UTR  
184 to the total expression of the top two expressed (on average) isoforms per gene. 919 genes with several isoforms  
185 expressed at 5 CPM or higher on average in either condition were considered for the analysis. 9 genes with CV's  
186 below the 0.1<sup>st</sup> percentile of the log normal fit in either condition were excluded from the analysis.

187  
188  
189  
190  
191  
192  
193  
194  
195  
196  
197  
198  
199  
200  
201  
202  
203

**A**

Gene profiles Heatmap 3D model

**Gene/miRNA names**

**Expression level**  
 gene level estimates  
 isoform level estimates

**Expression measure**

**Samples**

- N2\_sRNA\_A1
- N2\_sRNA\_A2
- N2\_sRNA\_A3
- N2\_sRNA\_P1
- N2\_sRNA\_P2
- N2\_mRNA\_A1
- N2\_mRNA\_A2
- N2\_mRNA\_A3
- N2\_mRNA\_P1
- N2\_mRNA\_P2
- N2\_mRNA\_P3
- gid-2\_gid-1\_mRNA\_A1
- gid-2\_gid-1\_mRNA\_A2
- gid-2\_gid-1\_mRNA\_P1
- gid-2\_gid-1\_mRNA\_P2
- gip-1\_gt\_mRNA\_A1
- gip-1\_gt\_mRNA\_A2
- gip-1\_gt\_mRNA\_P1
- gip-1\_gt\_mRNA\_P2

**Plot options**

- show raw data points
- show raw data lines
- show per-sample smooth fits (LOESS)
- show across-sample smooth fit (LOESS)
- scale y-axis logarithmically (log2)
- fix x-axis limits
- use single y-scale for all sub-plots
- manually set y-axis limits
- show slice width bars
- show gonad arm model (if single column & fixed x-axis limits)
- show smoothing standard error
- show dropout slices (<10K pseudoaligned reads)

**# plot columns**

**# points to impute for smoothing**

**Span to use for smoothing**

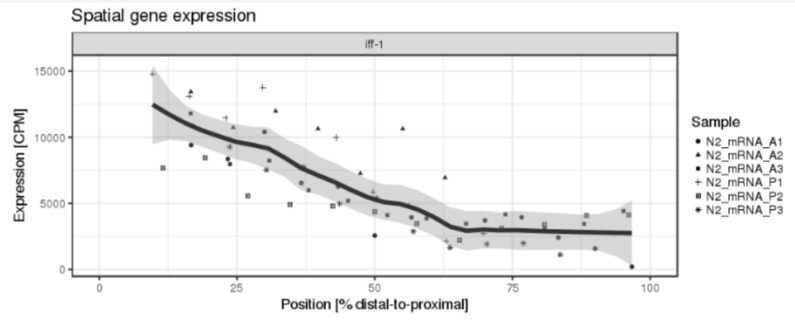

**B**

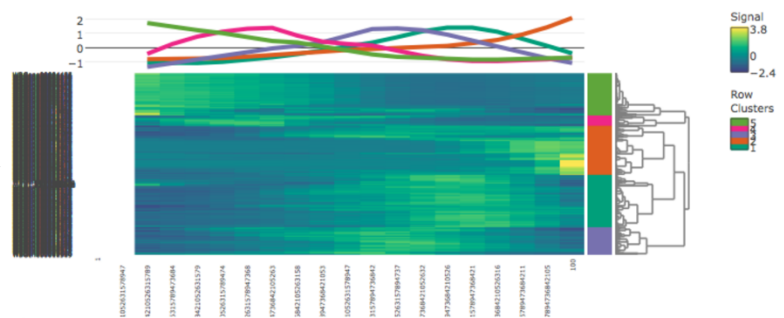

**C**

Show 10 entries Search:

| gene            | cluster | cpm.sd   | gene.name | cpm.mean  | cpm.min    | cpm.max   | cpm.lfc  | percent.min | percent.max |
|-----------------|---------|----------|-----------|-----------|------------|-----------|----------|-------------|-------------|
| WBGene000000063 | 2       | 150.3355 | act-1     | 444.42205 | 287.880408 | 887.1298  | 1.623676 | 11          | 100         |
| WBGene000000064 | 2       | 217.3223 | act-2     | 950.31426 | 721.375190 | 1468.7702 | 1.025787 | 21          | 100         |
| WBGene000000065 | 2       | 182.0537 | act-3     | 367.23084 | 146.330633 | 624.0423  | 2.092412 | 11          | 100         |
| WBGene000000066 | 2       | 177.5241 | act-4     | 167.81456 | 10.845970  | 550.8107  | 5.666326 | 21          | 100         |
| WBGene00000122  | 2       | 127.6262 | aly-3     | 246.49965 | 98.310460  | 460.4766  | 2.227711 | 21          | 100         |
| WBGene00000214  | 2       | 393.0484 | asp-1     | 135.72099 | 4.532270   | 1626.1109 | 8.486976 | 42          | 100         |
| WBGene00000216  | 2       | 273.4614 | asp-3     | 94.70637  | 3.570602   | 1132.6150 | 8.309275 | 32          | 100         |
| WBGene00000219  | 2       | 127.7718 | asp-6     | 46.39141  | 1.280625   | 528.0479  | 8.687677 | 11          | 100         |
| WBGene00000235  | 2       | 136.0417 | baf-1     | 331.85190 | 163.615777 | 551.7123  | 1.753604 | 27          | 58          |
| WBGene00000301  | 2       | 164.4688 | cav-1     | 116.77045 | 4.714811   | 626.7365  | 7.054515 | 11          | 100         |

Showing 1 to 10 of 134 entries (filtered from 500 total entries)

Previous 1 2 3 4 5 ... 14 Next

**D**

Gene profiles Heatmap 3D model

**Genotype**

**Gene/miRNA name**

**Plot options**  
 manually set expression range limits

**Span to use for smoothing**

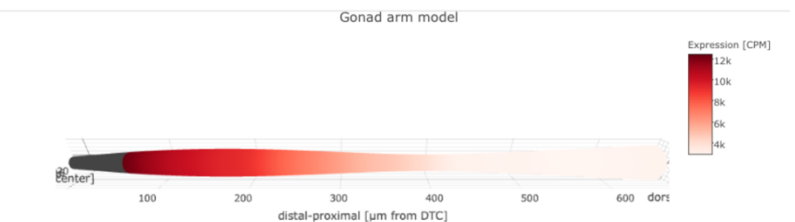

204  
205

206 **Figure S7. SPACEGERM: a user-friendly interface for exploring spatial expression across the germline in**  
207 **2D and 3D. Related to Figure 1, 2, 3, 4 and 6.**

208 (A) Plotting options for each transcript detected in our data. As an example, the spatial expression of *iff-1* is  
209 shown for all biological and technical replicates of N2, LOESS  $\pm$  standard error (SE).

210 (B) Global spatial gene expression can be investigated by clustering all detected genes according linear  
211 correlation (Pearson,  $r$ ) for all genotypes.  $\mu$ : Mean.  $\sigma$ : standard deviation. NA: No data.

212 (C) Result of clustering can be exported as an Excel file and investigated in more detail.

213 (D) Virtual *in situ* hybridization (vISH) using reconstructed 3D germline model. As an example, the spatial  
214 expression of *iff-1* is shown for all biological and technical replicates of N2.
